# Supplementary material for: Microbiome Learning Repo (ML Repo): A public repository of microbiome regression and classification tasks
Source: PubMed Central journal article supplement (PMC6493971; doi:10.1093/gigascience/giz042), 2019-04-26
Supplement: giz042_giga-d-18-00316_revision_1.pdf [file giz042_giga-d-18-00316_revision_1.pdf]

# GigaScience

## Microbiome Learning Repo (ML Repo): A public repository of microbiome regression and classification tasks

--Manuscript Draft--

|                                                      |                                                                                                                                                                                                                                                                                                                                                                                                                                                                                                                                                                                                                                                                                                                                                                                                                                                                                                                                                                                                                                                                                                                 |                |
|------------------------------------------------------|-----------------------------------------------------------------------------------------------------------------------------------------------------------------------------------------------------------------------------------------------------------------------------------------------------------------------------------------------------------------------------------------------------------------------------------------------------------------------------------------------------------------------------------------------------------------------------------------------------------------------------------------------------------------------------------------------------------------------------------------------------------------------------------------------------------------------------------------------------------------------------------------------------------------------------------------------------------------------------------------------------------------------------------------------------------------------------------------------------------------|----------------|
| <b>Manuscript Number:</b>                            | GIGA-D-18-00316R1                                                                                                                                                                                                                                                                                                                                                                                                                                                                                                                                                                                                                                                                                                                                                                                                                                                                                                                                                                                                                                                                                               |                |
| <b>Full Title:</b>                                   | Microbiome Learning Repo (ML Repo): A public repository of microbiome regression and classification tasks                                                                                                                                                                                                                                                                                                                                                                                                                                                                                                                                                                                                                                                                                                                                                                                                                                                                                                                                                                                                       |                |
| <b>Article Type:</b>                                 | Technical Note                                                                                                                                                                                                                                                                                                                                                                                                                                                                                                                                                                                                                                                                                                                                                                                                                                                                                                                                                                                                                                                                                                  |                |
| <b>Funding Information:</b>                          | National Institute of Allergy and Infectious Diseases (R01AI121383)                                                                                                                                                                                                                                                                                                                                                                                                                                                                                                                                                                                                                                                                                                                                                                                                                                                                                                                                                                                                                                             | Not applicable |
| <b>Abstract:</b>                                     | <p>The use of machine learning in high-dimensional biological applications, such as the human microbiome, has grown exponentially in recent years, but algorithm developers often lack domain expertise required for interpretation and curation of the heterogeneous microbiome datasets. We present Microbiome Learning Repo (ML Repo, available at <a href="https://knights-lab.github.io/MLRepo/">https://knights-lab.github.io/MLRepo/</a>), a public, web-based repository of 33 curated classification and regression tasks from 15 published human microbiome datasets. We highlight the use of ML Repo in several use cases to demonstrate its wide application, and expect it to be an important resource for algorithm developers.</p>                                                                                                                                                                                                                                                                                                                                                               |                |
| <b>Corresponding Author:</b>                         | Dan Knights<br><br>UNITED STATES                                                                                                                                                                                                                                                                                                                                                                                                                                                                                                                                                                                                                                                                                                                                                                                                                                                                                                                                                                                                                                                                                |                |
| <b>Corresponding Author Secondary Information:</b>   |                                                                                                                                                                                                                                                                                                                                                                                                                                                                                                                                                                                                                                                                                                                                                                                                                                                                                                                                                                                                                                                                                                                 |                |
| <b>Corresponding Author's Institution:</b>           |                                                                                                                                                                                                                                                                                                                                                                                                                                                                                                                                                                                                                                                                                                                                                                                                                                                                                                                                                                                                                                                                                                                 |                |
| <b>Corresponding Author's Secondary Institution:</b> |                                                                                                                                                                                                                                                                                                                                                                                                                                                                                                                                                                                                                                                                                                                                                                                                                                                                                                                                                                                                                                                                                                                 |                |
| <b>First Author:</b>                                 | Pajau Vangay, Ph.D.                                                                                                                                                                                                                                                                                                                                                                                                                                                                                                                                                                                                                                                                                                                                                                                                                                                                                                                                                                                                                                                                                             |                |
| <b>First Author Secondary Information:</b>           |                                                                                                                                                                                                                                                                                                                                                                                                                                                                                                                                                                                                                                                                                                                                                                                                                                                                                                                                                                                                                                                                                                                 |                |
| <b>Order of Authors:</b>                             | Pajau Vangay, Ph.D.<br>Benjamin M. Hillmann<br>Dan Knights, Ph.D.                                                                                                                                                                                                                                                                                                                                                                                                                                                                                                                                                                                                                                                                                                                                                                                                                                                                                                                                                                                                                                               |                |
| <b>Order of Authors Secondary Information:</b>       |                                                                                                                                                                                                                                                                                                                                                                                                                                                                                                                                                                                                                                                                                                                                                                                                                                                                                                                                                                                                                                                                                                                 |                |
| <b>Response to Reviewers:</b>                        | <p>Response to Reviewers</p> <p>Reviewer #1:<br/>This paper describes MLRepo, a database of standardized microbiome datasets to develop and evaluate machine learning algorithms. The strength of this resource is to provide machine learning researchers a panel of diverse datasets (e.g., regression and classification tasks of various levels of complexity and with a various number of samples), already curated and formatted, to evaluate in an objective way novel algorithms dedicated to the analysis of microbiome samples. It can also be useful for teaching purposes (e.g., for practical lab sessions or to set up "data challenges") and will obviously be valuable to the community of microbiome researchers to set-up meta-analyses.</p> <p>Overall I am very enthusiastic about this repository. As a machine-learning method developer interested in microbiome / metagenomics applications, I am indeed well aware that building curated databases and setting up baselines to evaluate novel algorithms is very time consuming, and that results reported in published papers are</p> |                |

sometimes hard to reproduce. I am therefore convinced that this repository will simplify the whole process and facilitate evaluating algorithms in an objective way. I am therefore very favorable in having this work published in Giga Science.

We thank Reviewer 1 for the enthusiasm, and are pleased that the reviewer thinks the manuscript will be important to the field.

My main comment comes as a suggestion. While the paper is relatively easy to follow for someone already aware of microbiome / metagenomics studies, some additional information may be useful to users of the database not familiar (at all) with metagenomics data. In particular (i) a glossary of technical terms specific to (meta)genomics data and analysis (e.g., OTU, 16s, fasta/fastq), and

We thank Reviewer 1 for this suggestion. We have added the following glossary to our manuscript:

OTUOperational Taxonomic Unit, group of closely related organisms based on DNA sequence similarity.

16S16S ribosomal RNA gene, component of the prokaryotic ribosome, used to reconstruct phylogenies.

FASTAText-based format for representing nucleotide sequences with single-letter codes.

FASTQText-based format for representing nucleotide sequences and corresponding quality scores, with single-letter codes for nucleotides and quality.

TaxaGroups of one or more populations of organisms. Usually summarized at phylum, class, order, family, genus, or species levels.

MetadataDescriptive data pertaining to samples within a study

ShotgunShotgun metagenomics sequencing breaks up all available DNA into random small segments and uses chain termination to sequence reads. Reads can be aligned directly to a reference database, or overlapping reads can be assembled into contiguous sequences.

(ii) some additional details regarding the format of the data provided, especially the taxonomic information provided in the "taxatable" files. In the same spirit, it could be interesting to highlight an important specificity of microbiome data, namely that the input variables (taxa/OTUS) are ordered in a hierarchy. Dedicated machine learning methods exist (or could be developed) to take into account this type of data. Altogether, this could further motivate machine learning researchers interested in the analysis of structured data to use this repository.

We thank the reviewer for this suggestion and agree that the count table formats deserves more detail. We have added the following lines to the manuscript:

These counts are presented in tables that are organized as follows: OTUs or taxa as rows, and samples as columns. OTUs are represented as either NCBI genome identifiers or Greengenes identifiers. Taxa are represented as "kingdom; phylum; class; order; family; genus; species; strain", with highest taxonomic specificity where possible.

Besides this general comment, I have a few questions that may deserve some clarifications in the main text :

\* It is mentioned in page 3 that "full details regarding the data processing are provided for each dataset in the repository", but I am not sure to find them.

We apologize for the lack of detail here. We have updated this line to include details for where to find these preprocessing steps:

Full details regarding the data preprocessing are provided for each data set in the mlrepo-source branch of the GitHub repository, under preprocessing/make.mappings.r.

\* I am not sure to understand what is meant by "samples with depths lower than 1000 sequences per samples were dropped". Do these 1000 sequences correspond to reads ? or to contigs ?

We apologize for the lack of clarity here, and would like to clarify that "1000 sequences" corresponds to sequencing reads. We dropped samples that contain less than a total of 1000 sequencing reads for 10 datasets, and less than a total of 100 sequencing reads for 5 datasets. The different thresholds were applied based on the

expected bacterial load of the sample types (e.g. colon biopsies are expected to have lower biomass than stool). We have updated the text as follows:

Samples with depths lower than 1000 sequencing reads per sample were dropped for n=10 datasets, while we applied a lower threshold of 100 sequencing reads per sample for n=5 datasets which had lower expected bacterial load.

\* This may be obvious but I am not sure to understand how are defined OTUs from shotgun sequencing data. Are they based on the 16s gene only or is the entire genome used somehow?

We apologize for the lack of clarity. Shotgun sequencing data uses all of the available sequencing reads within a sample to identify the genomes that are present. We did not construct contigs, but instead mapped the sequencing reads directly to the reference database, which is composed of full genomes from the NCBI RefSeq prokaryote database. We have added the following text to the glossary:

Shotgun metagenomics sequencing breaks up all available DNA into random small segments and uses chain termination to sequence reads. Reads can be aligned directly to a reference database, or overlapping reads can be assembled into contigs.

\* It is mentioned in page 3 that (i) "confounders were removed by dropping samples or stratification and (ii) "well-known confounders [...] were accounted for when constructing prediction tasks". Could the authors be more specific about these (important) steps ?

We thank the reviewer for this excellent question. We have updated the text to better explain how we subset samples to address confounders. We have also provided the location of the R script that shows how we processed each original metadata file.

Well-known confounders were accounted for when constructing prediction tasks for other human-associated conditions; for example, predicting age using the Yatsunenko 2012 dataset is restricted to samples from the U.S. due to the known variation in gut microbiomes across different geographical locations. Details of how samples were subsetted for each prediction task can be found in the mlrepo-source branch of the GitHub repository, under preprocessing/make.mappings.r.

\* In the same spirit, it is mentioned just after (top of page 4) that "confounders variables to control for" are reported in the tasks' metadata. This is indeed very valuable for the analysis and important to take into account. This is well explained in the Methods section, but I think it could be stressed in the main text (maybe simply by explicitly referring to the Methods section at this point).

We thank the reviewer for this suggestion and agree that more detail should be provided. We have updated the text as follows:

Hence, each prediction task is made available as an individual, compartmentalized metadata file that contains sample identifiers, responses to predict, and optionally, confounder variables that are inherent to the research study design such as paired healthy and diseased samples from the same subject (see Methods for more details).

\* In the case study, it could be interesting to comment why RFs tend to do better than SVMs according to AUC but not accuracy.

We thank the reviewer for this suggestion. We have added an explanation to the text as follows:

We found that random forest accuracy improvements were moderate when compared with SVM-Linear (P=0.083) and SVM-Radial (P=0.03) [Fig 4B], which may be explained by the fact that, unlike AUC, accuracy ignores class prediction probability estimates.

\* Since I assume that the number of OTUs will vary according to the nature of the samples (e.g., fewer in vaginal samples than stool samples), it could be interesting to mention in Table 1 the number of features involved in the various tasks. It could also be interesting to mention in this table whether the task involves classification or

regression.

We thank the reviewer for this excellent suggestion and have added an additional table (Table 2) that describes the prediction tasks, which includes the number of samples, number of features, and the response type, as seen below. A more detailed version of this table with additional columns of metadata is also available on GitHub under [web/data/tasks.txt](#). Note that the number of features are provided on a per-dataset basis, and not on a per-task or per-attribute basis. Microbiome abundance tables inherently contain a superset of OTUs/Taxa found across all samples within a study, and we chose to leave these tables largely intact so that the end-user can have maximum flexibility in generating new prediction tasks from the original mapping file.

\* Page 6 , lines 150-153. Could we simply say that this suggests that the OTU definitions made from GreenGenes and NCBI are consistent or is it more subtle? A comment on the respective merits (if any) of the two approaches (e.g., on the number of OTUs involved or in their level of taxonomic resolution) would be useful.

We thank the reviewer for this observation, and have added text to address the noted differences between these two references databases.

Note that OTU-picking against the Greengenes database resulted in more OTU features in every dataset [Table 2], hence, these findings may also highlight how the smaller, higher-quality NCBI RefSeq database can recover the same signal from the larger Greengenes database.

\* I assume that the operation consisting in "collapsing OTUs at a complete-linkage correlation of 95%" mentioned in the Methods section (page 8, line 194) has something to do with "cutting" a dendrogram built from the OTU correlation matrix. Could the authors be a bit more specific ?

We apologize for the lack of clarity and have added additional text to this sentence to detail the steps taken to collapse correlated OTUs:

...collapsed at a complete-linkage correlation of 95% (which is done by calculating the Pearson's correlation between each pair of OTUs using all complete pairs of observations, hierarchically clustering the results, and cutting the resulting dendrogram at a height of 0.05).

\* For the sake of completeness, I think it would be worth detailing a bit more in the "case study benchmarking" section how were optimized the hyper-parameters of the machine learning algorithms considered (namely the regularization parameter for the SVMs, the bandwidth of the kernel for the radial-SVM and the number of trees for the RF). For instance : which grids of parameter values were considered, whether there was some kind of "nested" cross-validation to optimize the parameters before predicting the data for the held-out data, and on which criterion (e.g., accuracy or AUC) was/were chosen the optimal parameter(s).

We thank the reviewer for pointing this out. We did not perform hyper-parameter optimization, nor grid-searching. We have updated the manuscript text to better describe the model parameter settings as follows:

Control parameters were set using the function `trainControl` with parameter `method = 'none'` and default parameters. Default settings for all models are as follows: SVM radial basis sigma is set to .1, all SVMs C is set to 1, and randomForest number of trees is set to 500 and number of variables to split is  $\sqrt{p}$ , where  $p$  is the number of features.

Minor comments and typos :

\* Page 1, line 16 : exist

Thank you for noting this. We have made this change:

Unfortunately, challenges still exist for machine learning algorithm developers who

often lack domain expertise required for interpretation and curation of the heterogeneous microbiome datasets.

\* Page 2 , line 38 : the term "parse" is vague.  
We have changed "parse" to "interpret", as follows:

In addition, microbiome research data can be challenging to access and analyze for expert machine learning algorithm developers, who often do not have the domain expertise required to interpret the data and metadata in complex microbiome studies.

\* Page 2, line 43 : "specifically for" may be replaced by "specific to" or "dedicated to"

We have changed "specifically for" to "dedicated to", as follows:

Currently, we are unaware of any machine learning repository dedicated to microbiome classification tasks.

\* Page 2, line 50 : "using" --> "involving" ; "curated" -->"derived"  
We have made the suggested changes, and the updated text is now:

We present the Microbiome Learning Repo (ML Repo), a repository of 33 curated classification and regression tasks involving human microbiome data. Our 33 tasks are derived from 15 publicly available human microbiome datasets, which include 12 amplicon-based and 3 shotgun sequencing datasets [Table 1].

\* Page 3, line 53 : "developer" --> "developers"

We have made the suggested change:

These datasets vary across sequencing technology platforms, 16s hypervariable regions, and study design, in order to help developers ensure robustness of algorithms across data types.

\* Page 4, line 86 : "methods developers" --> "method developers" (for consistency with "machine learning algorithm developers" used several times before)

We have made the suggested change:

Generally, we expect that method developers will be most interested in sweeping through the full set of prediction tasks for benchmarking, and hence would prefer to download a single compressed file containing all tasks and data.

\* Page 4, line 96 : "Sample Size and Response Type" --> "sample size and response type"

We have made the suggested change:

Task pages contain descriptive details such as sample size and response type that are specific to the selected prediction task, as well as links for downloading OTU tables, taxa tables, and sample metadata [Fig 2B].

\* Page 5, line 115 : the term "nuances" is vague

We apologize for the lack of clarity here, and have updated the text as follows:

The subsetted samples found in each prediction task metadata file replaces the work of rigorously deciphering metadata and understanding the subtle differences of individual research studies.

Reviewer #2:

The paper by Vangay et al. presents "ML Repo", a public repository of microbiome datasets for conducting regression and classification analysis based on machine learning approaches. The repository is a web-based service and includes currently 33 curated classification and regression tasks from 15 published human microbiome datasets. The authors presents several use cases to demonstrate its wide application. The topic involved in the paper is suitable for publication in the GigaScience journal. The manuscript is well written and well structured. In general, the paper is a nice

contribution for the microbiome community.

We thank the reviewer for these comments and are pleased that the reviewer finds that our manuscript will be a contribution to the community.

However, I have some comments before a possible publication:

1. The novelty of the proposed repository needs to be better described. In particular, they authors missed to cite two recent and in some way similar repositories:

i. The "MicrobiomeHD" database, mainly for 16S studies: "Duvallat, Claire, Sean M. Gibbons, Thomas Gurry, Rafael A. Irizarry, and Eric J. Alm. "Meta-analysis of gut microbiome studies identifies disease-specific and shared responses." Nature communications 8, no. 1 (2017): 1784."

ii. The "curatedMetagenomicData" database, mainly for shotgun studies: "Pasolli, Edoardo, Lucas Schiffer, Paolo Manghi, Audrey Renson, Valerie Obenchain, Duy Tin Truong, Francesco Beghini et al. "Accessible, curated metagenomic data through ExperimentHub." Nature methods 14, no. 11 (2017): 1023."

I think these two contributions should be added in the section "Comparison to similar databases" and novelties of the proposed repository with respect to them properly discussed.

We thank the reviewer for excellent suggestion of adding these two papers, and apologize for not including them previously. We have added the following text in the section "Comparison to similar databases":

Microbiome-based repositories that do provide manually curated metadata include curatedMetagenomicData and MicrobiomeHD. Although curatedMetagenomicData offers a collection of shotgun-metagenomics datasets with varying human sample types with gene, pathway, and taxonomic abundance tables, its data are accessible only via Bioconductor and are stored as ExpressionSet objects, which integrates metadata and abundance data. Although curatedMetagenomicData is an impressive repository with many features, it is most suitable for advanced bioinformaticians as its interface may hinder use by beginner data analysts and in teaching environments. MicrobiomeHD offers easily accessible taxonomic abundance tables with curated metadata, but is limited only to amplicon-based sequencing data, human stool samples, and case-control responses. And although both curatedMetagenomicData and MicrobiomeHD provide manually curated metadata, biological interpretation is still required as other sample metadata, for example antibiotic usage, may have biological relevance in predicting responses. This poses a potential problem for machine learning developers with limited biological and microbiome domain expertise. MLRepo resolves this issue by explicitly defining classification and regressions tasks for predicting responses that have been manually curated to either remove confounders or have been specifically annotated with biological confounders that must be controlled for. Metadata files in MLRepo are task-specific, and hence, are simplified to contain only: (1) sample identifiers indicating samples that should be used for the prediction task, (2) corresponding high-level phenotypes or responses, and optionally, (3) a confounder that should be accounted for due to its biological relevance. In addition, datasets in MLRepo include both amplicon-based and shotgun-metagenomics datasets covering a variety of human sample types, and are easily accessible via a web-interface.

2. The repository aims at providing metadata for both classification and regression tasks, as explicitly written also in the title. However, from my understanding use cases were reported on classification tasks only. Could you add some example on regression tasks?

We thank the reviewer for this suggestion. For space limitation reasons we have not added a whole section demonstrating a parameter sweep on the regression tasks. However, our work demonstrates that sweeping across parameters can inform future machine learning development efforts in regression, and we have emphasized the inclusion of regression tasks throughout the manuscript.

3. Do you expect to add new datasets in the future? Can users contribute to them?



Please describe better this aspect in the paper and potentially on the website.

We do expect to add new datasets in the future, and also allow users to contribute to our repository. We apologize for not making the instructions more explicit. We have updated this section of our manuscript to point to the instructions for adding new datasets. We have provided the contents of <https://github.com/knights-lab/MLRepo/blob/master/add-datasets-readme.md> below (note that when viewed on GitHub, words referring to tools, databases, or GitHub tasks are hyperlinked to respective websites with instructions):

Steps for submitting a new dataset and/or task

- 1.If you have either the raw FASTQ or processed FASTA file, please deposit it into a public repository. We list large files via publicly accessible URLs and do not support uploading of any large files. If you need assistance, please contact us.
- 2.If starting with FASTQ, we recommend processing with SHI7 and OTU-picking with BURST, with NCBI RefSeq Prokaryote files and Green genes 97
- 3.Fork our repository.
- 4.Add new tasks and datasets directly into tasks and datasets. Make sure to fill out all sections.
- 5.We expect you to apply rigorous standards in filtering, subsetting, and selecting samples for your classification and regression tasks.
- 6.When ready, submit a pull request for our review.

We provide instructions on our GitHub repository (<https://github.com/knights-lab/MLRepo/blob/master/add-datasets-readme.md>) to guide users to create a fork from our repository, add the appropriate data and files, and update the master task and dataset lists.

4. Line 75: "Well-known confounders, such as geography, were accounted for when constructing prediction tasks for other human-associated conditions". I did not understand how this was really implemented in your analysis.

We thank the reviewer for pointing this out. We have updated the text below to better explain how we subset samples to address confounders. We have also provided the location of the R script that shows how we processed each original metadata file.

Well-known confounders were accounted for when constructing prediction tasks for other human-associated conditions; for example, predicting age using the Yatsunenکو 2012 dataset is restricted to samples from the U.S. due to the known variation in gut microbiomes across different geographical locations. Details of how samples were subsetted for each prediction task can be found in the mlrepo-source branch of the GitHub repository, under preprocessing/make.mappings.r.

Reviewer #3:

In this contribution the authors present a repository of machine learning tasks, or 'challenges', concerning the prediction of a range of (human) host phenotypes from the composition of (one of) its microbiome(s). Other, non-phenotypical responses are concerned with host geographic location, body habitat, diet or antibiotic treatment. In general, this effort is highly appreciated, since the collection of suitable benchmark datasets and their standardisation is - at least - 50% of the work when developing machine learning (and other, baseline) methods.

The manuscript as a whole is in good shape and I specifically like the figures. My only real concern - and that's where the minor corrections come in - would be the general understandability of the manuscript to a non-microbiome audience, specifically to the envisaged (as one user type) CS-type user. The comparison to the UCI machine learning repository illustrates this concern best: what if a machine learning expert lacking any biological background (i.e. not a microbiome-bioinformatics nor a bioinformatics but 'merely' an informatics person) was interested in your datasets and would read the paper as an introduction to using the data? Even with a bioinformatics background, while one will generally have heard about most of the basic concepts, it couldn't hurt to be reminded with some short additional explanations in the right places. I try to list those places in the following:

p3,156: 'We preprocessed raw sequences using...' - what do these tools do i.e. what does 'preprocessing' refer to exactly in this case?

We apologize for the lack of detail here and have updated the manuscript text to the following:

Raw sequences were trimmed and quality filtered using SHI7 [12] or QIIME [13].

p3,159: 'We picked Operational Taxonomic Units (OTUs)...' - maybe briefly explain what this is, mainly the difference to the taxa counts

We thank the reviewer and agree that a definition is warranted. We have created a Glossary where we define OTU as follows:

OTUOperational Taxonomic Unit, group of closely related organisms based on DNA sequence similarity.

p3,172: 'When available, published study exclusion criteria was [were!] applied accordingly...' - an example of such exclusion criteria would explain what you mean in an instant, just like you already do for the confounders

We thank the reviewer for the suggestion, and have updated the text as follows:

When available, published study exclusion criteria, such as reported use of antibiotics, were applied accordingly and confounders were removed by dropping samples or stratification.

p3,177: '...to minimize the effect of high intra-individual similarities.' - it's not immediately obvious what you mean here, maybe rephrase? how does longitudinal data come in at all for your type of tasks? from reading it once i had the impression you'd have to select only one time point as the dataset for any given task anyway? i may well be missing a point here, so just make sure you spell it out as simple as you can.

We apologize for the lack of clarity and have replaced this text. We hope that the following text does a better job of explaining how we reduced the number of samples per subject.

Studies that were cross-sectional by design but contained several samples per subject were filtered to contain one sample per subject. In study designs with paired diseased-healthy or pre- and post-intervention samples, samples were reduced to two samples per subject with subject identifiers provided as confounder variables.

p8,1193: '...collapsed at a complete-linkage correlation of 95%.' - i totally didn't get this, it's definitely st you can save lots of (non-microbiome) people the time to think about by adding a short explanation

We apologize for the lack of clarification here and have updated the text as follows:

...collapsed at a complete-linkage correlation of 95% (which is done by calculating the Pearson's correlation between each pair of OTUs using all complete pairs of observations, hierarchically clustering the results, and cutting the resulting dendrogram at a height of 0.05).

This may or may not be exhaustive but I hope you do get the general point. I think the necessary additions are rather small, st rephrasing may be sufficient, st just one more sentence. I suppose the 'luxury' solution would be having those amendmends done to the manuscript \_and\_ providing a glossary page on your website, just for the 5-10 relevant terms - but whether or not that additional effort makes sense for you and your target audience is st only you can decide. I would definitely hope that, with the suggest additional explanations, the manuscript and therefore resource may be helpful for a slightly wider audience than without them.

We greatly appreciate the suggestions that the reviewer has made, and have also added the glossary below to assist with some of these concerns.



OTUOperational Taxonomic Unit, group of closely related organisms based on DNA sequence similarity.  
16S16S ribosomal RNA gene, component of the prokaryotic ribosome, used to reconstruct phylogenies.  
FASTAText-based format for representing nucleotide sequences with single-letter codes.  
FASTQText-based format for representing nucleotide sequences and corresponding quality scores, with single-letter codes for nucleotides and quality.  
TaxaGroups of one or more populations of organisms. Usually summarized at phylum, class, order, family, genus, or species levels.  
MetadataDescriptive data pertaining to samples within a study  
ShotgunShotgun metagenomics sequencing breaks up all available DNA into random small segments and uses chain termination to sequence reads. Reads can be aligned directly to a reference database, or overlapping reads can be assembled into contiguous sequences.

Let me finish with some further, random points, in order of appearance:

general 1: Should already the abstract contain a link to your website? It's often done like that.

We have added the website URL to the abstract:

We present Microbiome Learning Repo (ML Repo, available at <https://knights-lab.github.io/MLRepo/>), a public, web-based repository of 33 curated classification and regression tasks from 15 published human microbiome datasets.

general 2: I was wondering whether or not the term 'task' could generally be replaced by 'challenge' to make it more clear?

We have decided not to change the term 'task' because this term is commonly used in the machine-learning community, especially when referring to prediction tasks, and we want to make the manuscript as accessible as possible to the machine learning community.

p3,l53: developer -> developers

This text has been updated as suggested.

p3,l56: I don't think the 'n=number' style of writing is necessary or in any way beneficial to the reader, so just put the number. This is true for all its occurrences throughout the manuscript.

We have removed 'n=' throughout the manuscript.

p3,l62: I may get it wrong but isn't the 'per sample' redundant here? Or do the two 'sample'-s in the first part of the sentence refer to two different things? And what does 'depths' mean? If it's just the number of sequences then 'Samples with less than...' would do the job and make reading easier. This issue recurs at least once below. So fix both in case.

We have updated the text as follows:

Samples with less than 1000 sequencing reads were dropped for 10 datasets, while we applied a lower threshold of 100 sequencing reads per sample for 5 datasets which had lower expected bacterial load.

p4,l96: You use uppercase very sparingly, can't see why to use it in 'Sample Size and Response Type' here.

This text has been updated as suggested.

p5,l105: Use it here, in 'Machine Learning Repository' instead, esp. given you do use it when mentioning this resource first.

This text has been updated as suggested.

p5,l114: Can't you just scrap the 'prediction tasks.' here?

Yes, 'prediction tasks' have been removed from this text.

p5,l115: replaces -> replace

This text has been updated as suggested.

p5,l116: I don't quite understand how the 'Hence...' logically connects this sentence with the preceding one. Like, what have both to do with each other?

We agree with this observation. We have removed 'Hence' from this text.

p5,l125: Is it, logically speaking, not already 'for assigning' i.e. when you come up with high-level binary classes that later make your responses for prediction?

We have added extensive detail to this section describing what features discriminate ML Repo from, and make it more amenable to use by machine learning experts than, other efforts to collate microbiome data.

p6,l140: Here you comment on AUC being generally accepted etc, however, you already use it (without such a comment) earlier in the same para. Maybe revise slightly.

We thank the reviewer for pointing this out. We have moved this comment to the first mention of AUC, as follows:  
Sweeping through available tasks with binary responses, we compare our models by examining receiver operating curves (ROCs) and areas under the curve (AUC), considered the standard method for machine learning model evaluation [23,24] [Fig 3].

p7,l160: This needs rephrasing! Right now you 'accept and merge' the actual researchers into your repo - they may not like this :)

We apologize for this incorrect phrasing. We have updated the text as follows:  
Researchers can then submit a pull request for our review, and requests that are properly formatted will be accepted and merged into the repository

p8,l195: 'with smaller sample sizes' -> 'with fewer samples'?

This text has been updated as suggested.

One last important bit I just noticed: the mapping-orig.txt type links do not work for me as of 21/09/18 and must be fixed, e.g. <https://knights-lab.github.io/MLRepo/docs/datasets/claesson/mapping-orig.txt>.

We thank the reviewer for catching this important broken link. We have fixed our code and updated all of the original mapping file links. They should all be working now.

**Additional Information:**

| Question | Response |
|----------|----------|
|----------|----------|

|                                                                               |    |
|-------------------------------------------------------------------------------|----|
| Are you submitting this manuscript to a special series or article collection? | No |
|-------------------------------------------------------------------------------|----|

|                                                                                                                                                                                                                                                |     |
|------------------------------------------------------------------------------------------------------------------------------------------------------------------------------------------------------------------------------------------------|-----|
| <p><b>Experimental design and statistics</b></p> <p>Full details of the experimental design and statistical methods used should be given in the Methods section, as detailed in our <a href="#">Minimum Standards Reporting Checklist</a>.</p> | Yes |
|------------------------------------------------------------------------------------------------------------------------------------------------------------------------------------------------------------------------------------------------|-----|

|                                                                                                                                                                                                                                                                                                                                                                                                                                                                                                                                                         |            |
|---------------------------------------------------------------------------------------------------------------------------------------------------------------------------------------------------------------------------------------------------------------------------------------------------------------------------------------------------------------------------------------------------------------------------------------------------------------------------------------------------------------------------------------------------------|------------|
| <p>Information essential to interpreting the data presented should be made available in the figure legends.</p> <p>Have you included all the information requested in your manuscript?</p>                                                                                                                                                                                                                                                                                                                                                              |            |
| <p><b>Resources</b></p> <p>A description of all resources used, including antibodies, cell lines, animals and software tools, with enough information to allow them to be uniquely identified, should be included in the Methods section. Authors are strongly encouraged to cite <a href="#">Research Resource Identifiers</a> (RRIDs) for antibodies, model organisms and tools, where possible.</p> <p>Have you included the information requested as detailed in our <a href="#">Minimum Standards Reporting Checklist</a>?</p>                     | <p>Yes</p> |
| <p><b>Availability of data and materials</b></p> <p>All datasets and code on which the conclusions of the paper rely must be either included in your submission or deposited in <a href="#">publicly available repositories</a> (where available and ethically appropriate), referencing such data using a unique identifier in the references and in the “Availability of Data and Materials” section of your manuscript.</p> <p>Have you have met the above requirement as detailed in our <a href="#">Minimum Standards Reporting Checklist</a>?</p> | <p>Yes</p> |

[Click here to view linked References](#)

1  
2  
3  
4 **Microbiome Learning Repo (ML Repo): A public repository of microbiome regression**  
5  
6 **and classification tasks**  
7  
8  
9

10  
11 Pajau Vangay<sup>1</sup>, Benjamin M. Hillmann<sup>2</sup>, Dan Knights<sup>12\*</sup>  
12  
13  
14

15  
16 <sup>1</sup>Bioinformatics and Computational Biology, University of Minnesota, Minneapolis, MN, 55455,  
17  
18 vanga015@umn.edu, <https://orcid.org/0000-0002-9231-0692>  
19  
20

21 <sup>2</sup>Department of Computer Science and Engineering, University of Minnesota, Minneapolis, MN,  
22  
23 55455, hillm096@umn.edu, <https://orcid.org/0000-0003-4276-1329>  
24  
25

26  
27  
28 \*Corresponding author: [dknights@umn.edu](mailto:dknights@umn.edu), <https://orcid.org/0000-0002-8205-251>  
29  
30  
31  
32  
33  
34  
35  
36  
37  
38  
39

40 **Abstract**  
41

42  
43 The use of machine learning in high-dimensional biological applications, such as the human  
44  
45 microbiome, has grown exponentially in recent years, but algorithm developers often lack  
46  
47 domain expertise required for interpretation and curation of the heterogeneous microbiome  
48  
49 datasets. We present Microbiome Learning Repo (ML Repo, available at [https://knights-  
52  
53 lab.github.io/MLRepo/](https://knights-<br/>50<br/>51 lab.github.io/MLRepo/)), a public, web-based repository of 33 curated classification and  
54  
55 regression tasks from 15 published human microbiome datasets. We highlight the use of ML  
56  
57  
58  
59  
60  
61  
62  
63  
64  
65

1  
2  
3  
4 Repo in several use cases to demonstrate its wide application, and expect it to be an important  
5  
6 resource for algorithm developers.  
7  
8  
9

10  
11  
12  
13  
14 **Keywords**  
15

16 Microbiome, machine learning, repository, database  
17  
18  
19  
20  
21  
22

23  
24 **Findings**  
25  
26

27  
28 **Background**  
29

30 Machine learning is widely used as a method for classification and prediction, with a growing  
31 number of applications in human health [1]. The use of machine learning in biological fields  
32 [2,3], and more specifically the microbiome research field [4–7], has grown exponentially due to  
33 the robustness of these algorithms to high dimensional data. However, challenges exist for large-  
34 scale meta-analysis as they often require manual curation of metadata and standardized  
35 processing of raw sequence data, resulting in variation in the results derived from chosen  
36 datasets across studies [8,9]. In addition, microbiome research data can be challenging to access  
37 and analyze for expert machine learning algorithm developers, who often do not have the domain  
38 expertise required to interpret the data and metadata in complex microbiome studies. There exist  
39 general resources with curated classification tasks from variety of domains. The University of  
40 California Irvine (UCI) Machine Learning Repository [10] revolutionized machine learning  
41 methods development by giving developers access to many curated datasets; its widespread  
42 usage and impact can be seen from its thousands of resulting citations. Currently, we are  
43  
44  
45  
46  
47  
48  
49  
50  
51  
52  
53  
54  
55  
56  
57  
58  
59  
60  
61  
62  
63  
64  
65

1  
2  
3  
4 unaware of any machine learning repository dedicated to microbiome classification tasks. We  
5  
6 constructed a complementary database to address this deficiency, in order to promote the  
7  
8 development of and usage of improved machine learning methods for the microbiome  
9  
10 community.  
11  
12  
13  
14

## 15 **Workflow**

16  
17  
18 We present the Microbiome Learning Repo (ML Repo), a repository of 33 curated classification  
19  
20 and regression tasks involving human microbiome data. Our 33 tasks are derived from 15  
21  
22 publicly available human microbiome datasets, which include 12 amplicon-based and 3 shotgun  
23  
24 sequencing datasets [Table 1]. These datasets vary across sequencing technology platforms, 16S  
25  
26 hypervariable regions, and study design, in order to help developers ensure robustness of  
27  
28 algorithms across data types. We streamlined the microbiome data using a single post-processing  
29  
30 workflow [Fig 1A]. We downloaded trimmed and quality filtered sequencing reads for 8 datasets  
31  
32 from QIITA [11], and raw sequences for 7 datasets from public repositories. Raw sequences  
33  
34 were trimmed and quality filtered using SHI7 [12] or QIIME [13]. We picked Operational  
35  
36 Taxonomic Units (OTUs) from all quality filtered sequences using a closed-reference method  
37  
38 with the BURST [14] aligner against both the NCBI RefSeq 16S ribosomal RNA project [15]  
39  
40 and the Greengenes 97 database [16]. Samples with less than 1000 sequencing reads were  
41  
42 dropped for 10 datasets, while we applied a lower threshold of 100 sequencing reads per sample  
43  
44 for 5 datasets which had lower expected bacterial load. Full details regarding the data  
45  
46 preprocessing are provided for each data set in the *mlrepo-source* branch of the GitHub  
47  
48 repository, under preprocessing/make.mappings.r. As a result, for each dataset we generated  
49  
50 RefSeq-based OTU and taxa abundance counts, and Greengenes-based OTU and taxa abundance  
51  
52 counts. These counts are presented in tables that are organized as follows: OTUs or taxa as rows,  
53  
54  
55  
56  
57  
58  
59  
60  
61  
62  
63  
64  
65



1  
2  
3  
4 and samples as columns. OTUs are represented as either NCBI genome identifiers or Greengenes  
5  
6 identifiers. Taxa are represented as “*kingdom; phylum; class; order; family; genus; species;*  
7  
8 *strain*”, with highest taxonomic specificity where possible. We excluded additional post-  
9  
10 processing filtering and normalization steps so that these parameters can be included in future  
11  
12 benchmarking use cases as needed. We also limit our data to OTU and taxa tables as other  
13  
14 metrics such as alpha and beta diversity can be subsequently generated as needed.  
15  
16  
17  
18  
19  
20

21 Sample metadata from individual studies were manually curated to generate viable prediction  
22  
23 tasks. When available, published study exclusion criteria, such as reported use of antibiotics,  
24  
25 were applied accordingly and confounders were removed by dropping samples or stratification.  
26  
27 Well-known confounders were accounted for when constructing prediction tasks for other  
28  
29 human-associated conditions; for example, predicting age using the *Yatsunenko 2012* dataset is  
30  
31 restricted to samples from the U.S. due to the known variation in gut microbiomes across  
32  
33 different geographical locations. Details of how samples were subset for each prediction task can  
34  
35 be found in the *mlrepo-source* branch of the GitHub repository, under  
36  
37 preprocessing/make.mappings.r. Studies that were cross-sectional by design but contained  
38  
39 several samples per subject were filtered to contain one sample per subject. In study designs with  
40  
41 paired diseased-healthy or pre- and post-intervention samples, samples were reduced to two  
42  
43 samples per subject with subject identifiers provided as confounder variables. Hence, each  
44  
45 prediction task is made available as an individual, compartmentalized metadata file that contains  
46  
47 sample identifiers, responses to predict, and optionally, confounder variables that are inherent to  
48  
49 the research study design such as paired healthy and diseased samples from the same subject (see  
50  
51  
52  
53  
54  
55  
56  
57  
58  
59  
60  
61  
62  
63  
64  
65

1  
2  
3  
4 Methods for more details). As a result, we generated 33 distinct tasks for predicting human-  
5 associated responses.  
6  
7  
8  
9

## 10 **Publicly available web-based interface**

11  
12  
13 We expect two types of users: (1) machine-learning algorithm developers with limited  
14 knowledge of microbiome study designs and (2) microbiome researchers interested in obtaining  
15 additional datasets for meta-analysis. Generally, we expect that method developers will be most  
16 interested in sweeping through the full set of prediction tasks for benchmarking, and hence  
17 would prefer to download a single compressed file containing all tasks and data. On the other  
18 hand, we expect that microbiome researchers will be more selective in downloading specific  
19 datasets and tasks depending on their research domain. Hence, researchers may prefer to browse  
20 specific details about tasks and datasets prior to downloading.  
21  
22  
23  
24  
25  
26  
27  
28  
29  
30  
31  
32  
33  
34

35 Based on these expected use cases, we created a publicly available web-interface for ML Repo  
36 hosted by GitHub Pages [17]. Tasks are organized by relevant response categories [Fig 2A].  
37

38 Task pages contain descriptive details such as sample size and response type that are specific to  
39 the selected prediction task, as well as links for downloading OTU tables, taxa tables, and sample  
40 metadata [Fig 2B]. Dataset pages contain important details about the entire dataset, including  
41 links to the original research study, as well as original metadata files and quality filtered  
42 sequences [Fig 2C]. We also provide a single compressed file containing the entire set of  
43 available tasks (OTU tables, taxa tables, and relevant metadata) for download from the main  
44 home page.  
45  
46  
47  
48  
49  
50  
51  
52  
53  
54  
55  
56  
57  
58  
59  
60  
61  
62  
63  
64  
65

## **Benefits of curated microbiome-based prediction tasks**

We expect ML Repo to be beneficial for both the machine-learning community as well as the microbiome research community. ML Repo will be a powerful complement to UCI's Machine Learning Repository, as it will allow for benchmarking curated classification tasks with high-dimensional data, and hence enable the subsequent development of novel algorithms for these complex datasets. Our streamlined approach in generating OTU and taxa tables offers a rich set of 15 datasets that microbiome researchers can use directly for further comparison with their own studies, for teaching and learning purposes, or for large meta-analyses. We expect that our provided OTU and taxa tables will also be beneficial for researchers with limited access to high-performance computing resources or bioinformatics skills necessary for processing raw sequencing data. In addition, we expect microbiome-specific methods development will also benefit from our repository. The subset of samples found in each prediction task metadata file replace the work of rigorously deciphering metadata and understanding the subtle differences of individual research studies. New methods, such as OTU-picking algorithms, can be evaluated not only on metrics such as speed and accuracy, but also based on overall impact to study findings.

## **Comparison to similar databases**

Although a number of microbiome repositories exist, many are intended as data archival repositories [18,19] or function as resources for aggregating across studies [20]. Resources such as QIITA [11] offer an extensive collection of datasets, and mock-community-based Mockrobiota [21] is well-suited for benchmarking upstream methods, but neither offer support for the metadata interpretation necessary for predicting high-level phenotypes. Microbiome-based repositories that do provide manually curated metadata include curatedMetagenomicData [22] and MicrobiomeHD [23]. Although curatedMetagenomicData offers a collection of

1  
2  
3  
4 shotgun-metagenomics datasets with varying human sample types with gene, pathway, and  
5  
6 taxonomic abundance tables, its data are accessible only via Bioconductor [24] and are stored as  
7  
8 ExpressionSet objects, which integrates metadata and abundance data. Although  
9  
10 curatedMetagenomicData is an impressive repository with many features, it is most suitable for  
11  
12 advanced bioinformaticians as its interface may hinder use by beginner data analysts and in  
13  
14 teaching environments. MicrobiomeHD offers easily accessible taxonomic abundance tables  
15  
16 with curated metadata, but is limited only to amplicon-based sequencing data, human stool  
17  
18 samples, and case-control responses. And although both curatedMetagenomicData and  
19  
20 MicrobiomeHD provide manually curated metadata, biological interpretation is still required as  
21  
22 other sample metadata, for example antibiotic usage, may have biological relevance in predicting  
23  
24 responses. This poses a potential problem for machine learning developers with limited  
25  
26 biological and microbiome domain expertise. ML Repo resolves this issue by explicitly defining  
27  
28 classification and regressions tasks for predicting responses that have been manually curated to  
29  
30 either remove confounders or have been specifically annotated with biological confounders that  
31  
32 must be controlled for. Metadata files in ML Repo are task-specific, and hence, are simplified to  
33  
34 contain only: (1) sample identifiers indicating samples that should be used for the prediction  
35  
36 task, (2) corresponding high-level phenotypes or responses, and optionally, (3) a confounder that  
37  
38 should be accounted for due to its biological relevance. In addition, datasets in ML Repo include  
39  
40 both amplicon-based and shotgun-metagenomics datasets covering a variety of human sample  
41  
42 types, and are easily accessible via a web-interface.  
43  
44  
45  
46  
47  
48  
49  
50  
51  
52  
53

## 54 **Case studies**

55  
56  
57 We compare the performance of three machine learning models: a random forest [25], and a  
58  
59 support vector machine [26] (SVM) with either a radial or linear kernel. Sweeping through  
60  
61  
62  
63  
64  
65

1  
2  
3  
4 available tasks with binary responses, we compare our models by examining receiver operating  
5  
6 curves (ROCs) and areas under the curve (AUC), considered the standard method for machine  
7  
8 learning model evaluation [27,28] [Fig 3]. Through comparison of ROCs, we can see that  
9  
10 random forest outperforms or ties the other two models in 21 out of the 28 tasks. The choice of  
11  
12 kernels for SVM appears to have limited impact on overall mean accuracy, yet a linear kernel  
13  
14 can perfectly classify penicillin-treated and vancomycin-treated mouse cecal contents when the  
15  
16 other models could not; further examination of the microbial features in these samples may be  
17  
18 warranted to better understand the strengths of this kernel. We also performed pairwise  
19  
20 comparisons of random forest against the other models across all tasks. When evaluated by  
21  
22 AUC, random forest performs significantly better than both SVM with a linear kernel  
23  
24 (P=0.0014) and with a radial kernel (P=0.00032) [Fig 4A]. We found that random forest  
25  
26 accuracy improvements were moderate when compared with SVM-Linear (P=0.083) and SVM-  
27  
28 Radial (P=0.03) [Fig 4B], which may be explained by the fact that, unlike AUC, accuracy  
29  
30 ignores class prediction probability estimates. Our results support the broad usage [4,5,8,29] and  
31  
32 acceptance of random forest as a robust classifier [6] with high-dimensional microbiome data.  
33  
34  
35  
36  
37  
38  
39  
40  
41  
42

43 To assess the impact of reference database choice on classification accuracies, we also used the  
44  
45 classification tasks to compare random forest using OTUs picked with the Greengenes 97  
46  
47 database or the NCBI RefSeq Targeted Loci Project 16s project. We find that there is limited  
48  
49 impact of database choice to overall classification accuracies [Fig 4C, Fig 5]. This may be due to  
50  
51 (1) large effect sizes that are driven mainly by several well-characterized bacterial taxa present in  
52  
53 both databases (e.g. stool versus tongue samples), or (2) small effect sizes such that classification  
54  
55 is difficult regardless of the database (e.g. male versus female stool). Note that OTU-picking  
56  
57  
58  
59  
60  
61  
62  
63  
64  
65

1  
2  
3  
4 with the Greengenes database resulted in more OTU features in every dataset [Table 2], hence,  
5  
6 these findings further highlight how the smaller, higher-quality NCBI RefSeq database can  
7  
8 recover the same signal from the larger Greengenes database.  
9

## 10 11 12 **Future work**

13  
14  
15 We expect and hope that the broader microbiome research community will add new datasets and  
16  
17 prediction tasks to ML Repo. We provide instructions [30] on our GitHub repository to guide  
18  
19 users to create a fork from our repository, add the appropriate data and files, and update the  
20  
21 master task and dataset lists. Researchers can then submit a pull request for our review, and  
22  
23 requests that are properly formatted will be accepted and merged into the repository. We expect  
24  
25 that data submissions will come from either the original researchers or those well-acquainted  
26  
27 with the datasets, and hence will expect that sample selection and subsetting will have undergone  
28  
29 rigorous review for prediction tasks.  
30  
31  
32  
33  
34  
35

## 36 37 **Methods**

### 38 39 40 41 **Pre-processing of sequencing reads**

42  
43  
44 When available, preprocessed FASTA files were downloaded from QIITA (or previously, the  
45  
46 QIIME database). For all other datasets, raw FASTQ files were downloaded from sources listed  
47  
48 in Supplemental Table 1. Adaptors and barcodes were removed and sequences were quality  
49  
50 filtered (at Phred score  $\geq$  Q20) using SHI7 [12] or QIIME [13]. OTUs were picked from  
51  
52 processed FASTA files using BURST [31] with Greengenes [16] 97 or the NCBI RefSeq  
53  
54 Targeted Loci Project 16s project [15] (accessed on 17-07-04). Samples with sequencing depth  
55  
56  
57  
58  
59  
60  
61  
62  
63  
64  
65



1  
2  
3  
4 lower than 1000 sequences per sample were dropped for all studies, except for five datasets [32–  
5  
6  
7 36], where the minimum threshold was 100 sequences per sample.  
8  
9

### 10 **Selection of classification tasks**

11  
12  
13 Classification tasks were selected based on reported study results, biologically relevant high-  
14  
15  
16 level phenotypes, and sufficient sample sizes. Original metadata files and research methods were  
17  
18  
19 rigorously and manually curated in order to subset samples with minimal confounders. For  
20  
21  
22 confounders that were inherent to the study, we include an additional variable to control for in  
23  
24  
25 the task metadata files. Presence of control variables can be found by examining “control\_vars”  
26  
27  
28 in the Tasks table.  
29

### 30 **Website generation**

31  
32  
33 Website templating was developed using Jinja2 [37] and custom Python scripts. Individual  
34  
35  
36 webpages were generated by iterating through items in the Tasks and Datasets tables, and  
37  
38  
39 dynamically populating templates in order to generate individual Markdown [38] pages. The  
40  
41  
42 resulting Markdown pages are hosted as GitHub Pages.  
43

### 44 **Case Study Benchmarking**

45  
46  
47 Case study results were generated with custom R [39] scripts, which can be found in the  
48  
49  
50 */example* folder in the ML Repo Github repository. To compare machine learning models, we  
51  
52  
53 iterated through tasks with binary responses. OTU counts were converted to relative abundances,  
54  
55  
56 filtered at a minimum of 10% prevalence across samples, and collapsed at a complete-linkage  
57  
58  
59 correlation of 95% (which is done by calculating the Pearson’s correlation between each pair of  
60  
61  
62 OTUs using all complete pairs of observations, hierarchically clustering the results, and cutting  
63  
64  
65

1  
2  
3  
4 the resulting dendrogram at a height of 0.05). We then constructed a 5-fold cross-validation for  
5  
6 tasks containing more than 100 samples, or a leave-one-out cross-validation for tasks with fewer  
7  
8 sample. For n-fold cross validation, samples were assigned to folds such that classes were  
9  
10 equally balanced within each fold (e.g. if our task contained 40% healthy and 60% diseased  
11  
12 samples, our folds would also be selected to represent this distribution). For tasks that contained  
13  
14 control variables, we selected folds such that samples with the same control variable value were  
15  
16 contained within the same fold. For example, for a task dataset containing matching stool and  
17  
18 oral samples from subjects, the Subject Identifier would be listed as the control variable and we  
19  
20 should assign samples to folds such that all samples from a specific subject were contained  
21  
22 within a fold. This step is crucial to avoid biasing or overfitting the training model; test folds  
23  
24 should contain not only new samples, but also samples that are independent from those in the  
25  
26 training set. Models were constructed using the ‘caret’ package [40]. Control parameters were set  
27  
28 using the function trainControl with parameter method = ‘none’ and default parameters. Default  
29  
30 settings for all models are as follows: SVM radial basis sigma is set to .1, all SVMs C is set to 1,  
31  
32 and randomForest number of trees is set to 500 and number of variables to split is  $\sqrt{p}$ , where  
33  
34 p is the number of features. This entire process was bootstrapped 100 times, and the mean class  
35  
36 probabilities were used to calculate the resulting AUCs and ROCs. To compare classification  
37  
38 accuracies using different reference databases, we used a similar procedure but held the model  
39  
40 constant and predicted using different base OTU tables. This framework enables comparison of a  
41  
42 myriad of machine learning models available in the ‘caret’ package, and can be easily expanded  
43  
44 to compare different OTU-picking algorithms, or normalization and filtering techniques.  
45  
46  
47  
48  
49  
50  
51  
52  
53  
54  
55  
56  
57  
58  
59  
60  
61  
62  
63  
64  
65

1  
2  
3  
4 **Availability of supporting data**  
5

6  
7 All test datasets are available in the Microbiome Learning Repo site [17], snapshots of our code  
8  
9 and other supporting data are available in the *GigaScience* database, GigaDB [41].  
10  
11

12  
13  
14 **Availability of supporting source code and requirements**  
15

16  
17 Project name: Microbiome Learning Repo  
18

19 Project home page: <https://knights-lab.github.io/MLRepo/>  
20

21  
22 Operating system: Platform independent  
23

24 Programming language: Python, R  
25

26 License: MIT License  
27

28 Restrictions: None  
29

30 RRID: SCR\_017079  
31  
32  
33  
34  
35

36 **Glossary**  
37

38  
39

|          |                                                                                                                                                 |
|----------|-------------------------------------------------------------------------------------------------------------------------------------------------|
| 40 OTU   | Operational Taxonomic Unit, group of closely related organisms based on DNA sequence similarity.                                                |
| 41       |                                                                                                                                                 |
| 42       |                                                                                                                                                 |
| 43       |                                                                                                                                                 |
| 44 16S   | 16S ribosomal RNA gene, component of the prokaryotic ribosome, used to reconstruct phylogenies.                                                 |
| 45       |                                                                                                                                                 |
| 46       |                                                                                                                                                 |
| 47       |                                                                                                                                                 |
| 48 FASTA | Text-based format for representing nucleotide sequences with single-letter codes.                                                               |
| 49       |                                                                                                                                                 |
| 50       |                                                                                                                                                 |
| 51       |                                                                                                                                                 |
| 52 FASTQ | Text-based format for representing nucleotide sequences and corresponding quality scores, with single-letter codes for nucleotides and quality. |
| 53       |                                                                                                                                                 |
| 54       |                                                                                                                                                 |
| 55       |                                                                                                                                                 |
| 56 Taxa  | Groups of one or more populations of organisms. Usually summarized at phylum, class, order, family, genus, or species levels.                   |
| 57       |                                                                                                                                                 |
| 58       |                                                                                                                                                 |
| 59       |                                                                                                                                                 |
| 60       |                                                                                                                                                 |
| 61       |                                                                                                                                                 |
| 62       |                                                                                                                                                 |
| 63       |                                                                                                                                                 |
| 64       |                                                                                                                                                 |
| 65       |                                                                                                                                                 |

1  
2  
3  
4  
5 Metadata Descriptive data pertaining to samples within a study  
6

7  
8 Shotgun Shotgun metagenomics sequencing breaks up all available DNA into random small  
9 segments and uses chain termination to sequence reads. Reads can be aligned  
10 directly to a reference database, or overlapping reads can be assembled into  
11 contiguous sequences.  
12  
13  
14

## 15 **Declarations**

16  
17  
18  
19

### 20 **Authors' contributions**

21  
22 Conceptualization: P.V. and D.K.; Data curation: P.V.; Formal analyses: P.V.; Methodology:  
23 P.V., B.H., D.K.; Software: P.V.; Writing - original draft: P.V.; Writing - review and editing:  
24 B.H. and D.K.  
25  
26  
27  
28  
29  
30  
31

### 32 **Funding**

33  
34 This work is supported by funds from the National Institutes of Health Grant R01AI121383.  
35  
36  
37  
38

### 39 **Competing Interests**

40  
41 D.K. serves as CEO and holds equity in CoreBiome, a company involved in the  
42 commercialization of microbiome analysis. The University of Minnesota also has financial  
43 interests in CoreBiome under the terms of a license agreement with CoreBiome. These interests  
44 have been reviewed and managed by the University of Minnesota in accordance with its  
45 Conflict-of-Interest policies.  
46  
47  
48  
49  
50  
51  
52  
53  
54  
55  
56  
57  
58  
59  
60  
61  
62  
63  
64  
65

## References

1. Jordan MI, Mitchell TM. Machine learning: Trends, perspectives, and prospects. *Science*. 2015;349:255–60.
2. Shipp MA, Ross KN, Tamayo P, Weng AP, Kutok JL, Aguiar RCT, et al. Diffuse large B-cell lymphoma outcome prediction by gene-expression profiling and supervised machine learning. *Nat Med*. 2002;8:68–74.
3. Furey TS, Cristianini N, Duffy N, Bednarski DW, Schummer M, Haussler D. Support vector machine classification and validation of cancer tissue samples using microarray expression data. *Bioinformatics*. 2000;16:906–14.
4. Aagaard K, Riehle K, Ma J, Segata N, Mistretta T-A, Coarfa C, et al. A metagenomic approach to characterization of the vaginal microbiome signature in pregnancy. *PLoS One*. 2012;7:e36466.
5. Yatsunenko T, Rey FE, Manary MJ, Trehan I, Dominguez-Bello MG, Contreras M, et al. Human gut microbiome viewed across age and geography. *Nature*. 2012;486:222–7.
6. Knights D, Costello EK, Knight R. Supervised classification of human microbiota. *FEMS Microbiol Rev*. 2011;35:343–59.
7. Smith MI, Yatsunenko T, Manary MJ, Trehan I, Mkakosya R, Cheng J, et al. Gut microbiomes of Malawian twin pairs discordant for kwashiorkor. *Science*. 2013;339:548–54.
8. Pasolli E, Truong DT, Malik F, Waldron L, Segata N. Machine Learning Meta-analysis of Large Metagenomic Datasets: Tools and Biological Insights. *PLoS Comput Biol*. *Public Library of Science*; 2016;12:e1004977.
9. Sze MA, Schloss PD. Looking for a Signal in the Noise: Revisiting Obesity and the Microbiome. *MBio* [Internet]. 2016;7. Available from: <http://dx.doi.org/10.1128/mBio.01018-16>
10. Asuncion A, Newman D. UCI machine learning repository [Internet]. 2007. Available from: <https://ergodicity.net/2013/07/>
11. Qiita Development Team. Qiita [Internet]. Available from: <http://qiita.microbio.me/>
12. Al-Ghalith GA, Hillmann B, Ang K, Shields-Cutler R, Knights D. SHI7 Is a Self-Learning Pipeline for Multipurpose Short-Read DNA Quality Control. *mSystems* [Internet]. 2018;3. Available from: <http://dx.doi.org/10.1128/mSystems.00202-17>
13. Caporaso JG, Kuczynski J, Stombaugh J, Bittinger K, Bushman FD, Costello EK, et al. QIIME allows analysis of high-throughput community sequencing data. *Nat Methods*. 2010;7:335–6.
14. Al-Ghalith G, Knights D. BURST enables optimal exhaustive DNA alignment for big data [Internet]. Zenodo; 2017. Available from: <http://dx.doi.org/10.5281/ZENODO.806850>

15. O’Leary NA, Wright MW, Brister JR, Ciufu S, Haddad D, McVeigh R, et al. Reference sequence (RefSeq) database at NCBI: current status, taxonomic expansion, and functional annotation. *Nucleic Acids Res.* 2016;44:D733–45.
16. McDonald D, Price MN, Goodrich J, Nawrocki EP, DeSantis TZ, Probst A, et al. An improved Greengenes taxonomy with explicit ranks for ecological and evolutionary analyses of bacteria and archaea. *ISME J.* 2012;6:610–8.
17. Vangay P, Hillmann B, Knights D. MLRepo Github Page [Internet]. MLRepo. Available from: <https://knights-lab.github.io/MLRepo>
18. Hunter S, Corbett M, Denise H, Fraser M, Gonzalez-Beltran A, Hunter C, et al. EBI metagenomics—a new resource for the analysis and archiving of metagenomic data. *Nucleic Acids Res.* Oxford University Press; 2014;42:D600–6.
19. Leinonen R, Sugawara H, Shumway M, International Nucleotide Sequence Database Collaboration. The sequence read archive. *Nucleic Acids Res.* 2011;39:D19–21.
20. Forster SC, Browne HP, Kumar N, Hunt M, Denise H, Mitchell A, et al. HPMCD: the database of human microbial communities from metagenomic datasets and microbial reference genomes. *Nucleic Acids Res.* 2016;44:D604–9.
21. Bokulich NA, Rideout JR, Mercurio WG, Shiffer A, Wolfe B, Maurice CF, et al. mockrobiota: a Public Resource for Microbiome Bioinformatics Benchmarking. *mSystems* [Internet]. 2016;1. Available from: <http://dx.doi.org/10.1128/mSystems.00062-16>
22. Pasolli E, Schiffer L, Manghi P, Renson A, Obenchain V, Truong DT, et al. Accessible, curated metagenomic data through ExperimentHub. *Nat Methods.* 2017;14:1023–4.
23. Duvallet C, Gibbons SM, Gurry T, Irizarry RA, Alm EJ. Meta-analysis of gut microbiome studies identifies disease-specific and shared responses. *Nat Commun.* 2017;8:1784.
24. Gentleman RC, Carey VJ, Bates DM, Bolstad B, Dettling M, Dudoit S, et al. Bioconductor: open software development for computational biology and bioinformatics. *Genome Biol.* 2004;5:R80.
25. Breiman L. Random Forests. *Mach Learn.* 2001;45:5–32.
26. Cortes C, Vapnik V. Support-vector networks. *Mach Learn.* 1995;20:273–97.
27. Huang J, Ling CX. Using AUC and accuracy in evaluating learning algorithms. *IEEE Trans Knowl Data Eng.* 2005;17:299–310.
28. Ling CX, Huang J, Zhang H, Others. AUC: a statistically consistent and more discriminating measure than accuracy. *IJCAI.* 2003. p. 519–24.
29. Karlsson FH, Tremaroli V, Nookaew I, Bergström G, Behre CJ, Fagerberg B, et al. Gut metagenome in European women with normal, impaired and diabetic glucose control. *Nature.* 2013;498:99–103.



- 1  
2  
3  
4 30. Vangay P, Hillmann B, Knights D. Instructions for adding new datasets [Internet]. MLRepo  
5 Github. Available from: [https://github.com/knights-lab/MLRepo/blob/master/add-datasets-  
7 readme.md](https://github.com/knights-lab/MLRepo/blob/master/add-datasets-<br/>6 readme.md)  
8
- 9 31. Al-Ghalith G, Knights D. BURST enables optimal exhaustive DNA alignment for big data  
10 [Internet]. Zenodo; 2017. Available from: <http://dx.doi.org/10.5281/ZENODO.806850>  
11
- 12 32. Gevers D, Kugathasan S, Denson LA, Vázquez-Baeza Y, Van Treuren W, Ren B, et al. The  
13 treatment-naive microbiome in new-onset Crohn's disease. *Cell Host Microbe*. 2014;15:382–92.  
14
- 15 33. Human Microbiome Project Consortium. A framework for human microbiome research.  
16 *Nature*. 2012;486:215–21.  
17
- 18 34. Kostic AD, Gevers D, Pedamallu CS, Michaud M, Duke F, Earl AM, et al. Genomic analysis  
19 identifies association of *Fusobacterium* with colorectal carcinoma. *Genome Res*. 2012;22:292–8.  
20
- 21 35. David LA, Maurice CF, Carmody RN, Gootenberg DB, Button JE, Wolfe BE, et al. Diet  
22 rapidly and reproducibly alters the human gut microbiome. *Nature*. 2014;505:559–63.  
23
- 24 36. Turnbaugh PJ, Hamady M, Yatsunenko T, Cantarel BL, Duncan A, Ley RE, et al. A core gut  
25 microbiome in obese and lean twins. *Nature*. 2009;457:480–4.  
26
- 27 37. Ronacher A. Jinja2 [Internet]. 2017. Available from: <http://jinja.pocoo.org/>  
28
- 29 38. Gruber J, Swartz A, Others. Markdown. 2004.  
30
- 31 39. Team RC, Others. R: A language and environment for statistical computing. Citeseer; 2013;  
32 Available from:  
33 <http://citeseerx.ist.psu.edu/viewdoc/download?doi=10.1.1.470.5851&rep=rep1&type=pdf>  
34
- 35 40. Kuhn M, Others. Caret package. *J Stat Softw*. 2008;28:1–26.  
36
- 37 41. Vangay P; Hillmann BM; Knights D: Supporting data for "Microbiome Learning Repo (ML  
38 Repo): A public repository of microbiome regression and classification tasks" *GigaScience*  
39 Database. 2019. <http://dx.doi.org/10.5524/100581>.  
40  
41  
42  
43  
44  
45  
46  
47  
48  
49  
50  
51  
52  
53  
54  
55  
56  
57  
58  
59  
60  
61  
62  
63  
64  
65

## Tables

**Table 1. Microbiome datasets with available classification tasks in ML Repo.**

| Project Name    | V Region | Target size | Num samples | Num subjects | Area                   | Description                                                                     | Sequencing Technology | Study Design    |
|-----------------|----------|-------------|-------------|--------------|------------------------|---------------------------------------------------------------------------------|-----------------------|-----------------|
| Cho 2012        | V3       | 177         | 95          | 47           | Antibiotics            | Mouse fecal and cecal samples, Control vs. 4 kinds of antibiotics               | 454                   | Cross-Sectional |
| Claesson 2012   | V4       | 221         | 168         | 168          | Age                    | Elderly and young adults                                                        | 454                   | Cross-Sectional |
| David 2014      | V4       | 282         | 235         | 11           | Diet                   | Plant-based vs. Animal-based diet, Cross-over study                             | Illumina MiSeq        | Longitudinal    |
| Gevers 2014     | V4       | 173         | 1321        | 668          | IBD                    | Biopsies from IBD patients prior to treatment                                   | Illumina MiSeq        | Cross-Sectional |
| HMP 2012        | V35      | 527         | 6407        | 242          | Body Habitat, Gender   | Up to 18 body sites across 242 healthy subjects at 1-2 time points              | 454                   | Cross-Sectional |
| Kostic 2012     | V35      | 569         | 190         | 95           | Colorectal Cancer      | Adjacent Healthy vs. Tumor Colon Biopsy Tissues                                 | 454                   | Paired          |
| Montassier 2016 | V56      | 280         | 28          | 28           | Bacteremia             | Patients prior to chemotherapy who did or did not develop bacteremia            | 454                   | Cross-Sectional |
| Morgan 2012     | V35      | 569         | 231         | 231          | IBD                    | Healthy, Crohn's Disease, or Ulcerative Colitis patients                        | 454                   | Cross-Sectional |
| Turnbaugh 2009  | V2       | 230         | 281         | 154          | Obesity                | Monozygotic or dizygotic twin pairs concordant for BMI class, and their mothers | 454                   | Cross-Sectional |
| Wu 2011         | V12      | 244         | 95          | 10           | Diet                   | Controlled HighFat or LowFat feeding on 10 subjects over 10 days                | 454                   | Longitudinal    |
| Yatsunenko 2012 | V4       | 282         | 531         | 531          | Geography, Age, Gender | Humans of varying ages from the USA, Malawi, and Venezuela                      | Illumina MiSeq        | Cross-Sectional |
| Ravel 2011      | V12      | 240         | 396         | 396          | Bacterial Vaginosis    | Vaginal samples from four ethnic groups nugen scores for bacterial vaginosis    | 454                   | Cross-Sectional |
| Karlsson 2013   | NA       | NA          | 144         | 144          | Diabetes               | Patients with normal, impaired, or type 2 diabetes glucose tolerance categories | Illumina HiSeq        | Cross-Sectional |
| Qin 2012        | NA       | NA          | 134         | 134          | Diabetes               | Healthy vs type 2 diabetes Chinese patients                                     | Illumina HiSeq        | Cross-Sectional |
| Qin 2014        | NA       | NA          | 130         | 130          | Cirrhosis              | Cirrhosis versus healthy                                                        | Illumina HiSeq        | Cross-Sectional |

ML Repo contains 33 classification and regression tasks from 15 publicly available human microbiome datasets shown here.

**Table 2. Description of available prediction tasks**

| Dataset         | attributes                                                | description                                                                   | area         | Regression? | Sample Size | Number of Features |         |              |          | Control Vars |
|-----------------|-----------------------------------------------------------|-------------------------------------------------------------------------------|--------------|-------------|-------------|--------------------|---------|--------------|----------|--------------|
|                 |                                                           |                                                                               |              |             |             | OTU, refseq        | OTU, gg | Taxa, refseq | Taxa, gg |              |
| Cho 2012        | Abx: Control, Chlortetracycline                           | Five groups of mice treated with four different antibiotics or no antibiotics | Antibiotics  |             | 47          | 293                | 1144    | 299          | 141      | N            |
|                 | Abx: Control, Chlortetracycline                           | Five groups of mice treated with four different antibiotics or no antibiotics | Antibiotics  |             | 45          | 293                | 1144    | 299          | 141      | N            |
|                 | Abx: Penicillin, Vancomycin                               | Five groups of mice treated with four different antibiotics or no antibiotics | Antibiotics  |             | 47          | 293                | 1144    | 299          | 141      | N            |
|                 | Abx: Penicillin, Vancomycin                               | Five groups of mice treated with four different antibiotics or no antibiotics | Antibiotics  |             | 45          | 293                | 1144    | 299          | 141      | N            |
|                 | AGE: Elderly, Young                                       | Elderly or young adults                                                       | Age          |             | 167         | 569                | 3763    | 662          | 279      | N            |
| David 2014      | Diet: Plant, Animal                                       | Individuals on the last day of an animal or plant diet intervention           | Diet         |             | 18          | 1747               | 6293    | 1535         | 695      | Y            |
| Geviers 2014    | DIAGNOSIS: no, CD                                         | Healthy controls and Crohn's Disease patients                                 | IBD          |             | 140         | 943                | 3547    | 992          | 446      | N            |
|                 | DIAGNOSIS: no, CD                                         | Healthy controls and Crohn's Disease patients                                 | IBD          |             | 160         | 943                | 3547    | 992          | 446      | N            |
|                 | PCDAI                                                     | PCDAI scores of CD patients at 6 months post sampling                         | IBD          | X           | 68          | 943                | 3547    | 992          | 446      | N            |
| HMP 2012        | PCDAI                                                     | PCDAI scores of CD patients at 6 months post sampling                         | IBD          | X           | 51          | 943                | 3547    | 992          | 446      | N            |
|                 | HMPBODYSUPER SITE: Oral, Gastrointestinal_tract,          |                                                                               |              |             |             |                    |         |              |          |              |
|                 | HOST_SUBJECT_ID                                           | Gastrointestinal tract and oral cavity of healthy adults                      | Body Habitat |             | 2070        | 3121               | 9383    | 3090         | 1218     | Y            |
|                 | SEX: male, female                                         | Healthy male and female adults                                                | Gender       |             | 180         | 3121               | 9383    | 3090         | 1218     | N            |
|                 | HMPBODYSUBSITE: Stool, Tongue_dorsum;                     |                                                                               |              |             |             |                    |         |              |          |              |
| Karlsson 2013   | HOST_SUBJECT_ID                                           | Stool and tongue of healthy adults                                            | Body Habitat |             | 404         | 3121               | 9383    | 3090         | 1218     | Y            |
|                 | HMPBODYSUBSITE: Subgingival_plaque, Supragingival_plaque; |                                                                               |              |             |             |                    |         |              |          |              |
|                 | HOST_SUBJECT_ID                                           | Subgingival and supragingival plaque of healthy adults                        | Body Habitat |             | 408         | 3121               | 9383    | 3090         | 1218     | Y            |
|                 | Classification: IGT, T2D                                  | Impaired or type 2 diabetes glucose tolerance categories                      | Diabetes     |             | 101         | 12845              | NA      | 3758         | NA       | N            |
|                 | Classification: NGT, T2D                                  | Normal or type 2 diabetes glucose tolerance categories                        | Diabetes     |             | 96          | 12845              | NA      | 3758         | NA       | N            |
| Kostic 2012     | DIAGNOSIS: Healthy, Tumor; HOST_SUBJECT_ID                | Colorectal carcinoma tumors and adjacent nonaffected tissues                  | Cancer       |             | 172         | 908                | 3228    | 980          | 409      | Y            |
| Montassier 2016 | Treatment: bact, NObact                                   | Patients prior to chemotherapy who did or did not develop bacteremia          | Bacteremia   |             | 28          | 541                | 1852    | 640          | 228      | N            |

1  
2  
3  
4  
5  
6  
7  
8  
9  
10  
11  
12  
13  
14  
15  
16  
17  
18  
19  
20  
21  
22  
23  
24  
25  
26  
27  
28  
29  
30  
31  
32  
33  
34  
35  
36  
37  
38  
39  
40  
41  
42  
43  
44  
45  
46  
47  
48  
49  
50  
51  
52  
53  
54  
55  
56  
57  
58  
59  
60  
61  
62  
63  
64  
65

|                   |                                                                        |                                                                                   |           |   |     |       |       |     |     |   |
|-------------------|------------------------------------------------------------------------|-----------------------------------------------------------------------------------|-----------|---|-----|-------|-------|-----|-----|---|
| Morgan 2012       | ULCERATIVE_COLI<br>T_OR_CROHNS_DI<br>S: Crohn's disease,<br>Healthy    | Healthy, Crohn's Disease, or<br>Ulcerative Colitis patients                       | IBD       |   | 128 | 829   | 3677  | 877 | 367 | N |
|                   | ULCERATIVE_COLI<br>T_OR_CROHNS_DI<br>S: Ulcerative Colitis,<br>Healthy | Healthy, Crohn's Disease, or<br>Ulcerative Colitis patients                       | IBD       |   | 128 | 829   | 3677  | 877 | 367 | N |
| Qin 2012          |                                                                        |                                                                                   |           |   |     |       |       | 252 |     |   |
|                   | Diabetic: Y, N                                                         | Healthy or type 2 diabetes patients                                               | Diabetes  |   | 124 | 11880 | NA    | 6   | NA  | N |
| Qin 2014          |                                                                        |                                                                                   |           |   |     |       |       | 257 |     |   |
|                   | Cirrhotic: Cirrhosis,<br>Healthy                                       | Healthy or cirrhosis patients                                                     | Cirrhosis |   | 130 | 8483  | NA    | 9   | NA  | N |
|                   | Ethnic_Group:<br>Black, Hispanic                                       | Vaginal microbiomes of black and<br>hispanic women                                | Vaginal   |   | 199 | 586   | 1093  | 660 | 305 | N |
|                   | Nugent_score_cate<br>gory: low, high                                   | Predict nugent score category (low,<br>high) from vaginal microbiome              | Vaginal   |   | 342 | 586   | 1093  | 660 | 305 | N |
|                   | Nugent_score                                                           | Predict nugent score from vaginal<br>microbiome                                   | Vaginal   | X | 388 | 586   | 1093  | 660 | 305 | N |
|                   | pH                                                                     | Predict pH from vaginal<br>microbiome                                             | Vaginal   | X | 388 | 586   | 1093  | 660 | 305 | N |
|                   | Ethnic_Group:<br>White, Black                                          | Vaginal microbiomes of white and<br>black women                                   | Vaginal   |   | 200 | 586   | 1093  | 660 | 305 | N |
| Turmbaugh<br>2009 | OBESITYCAT:<br>Lean, Obese;<br>ZYGOSITY: MZ,<br>DZ, Mom                | Lean or Obese individuals<br>(monozygotic or dyzygotic twins or<br>their mothers) | Obesity   |   | 142 | 557   | 4051  | 680 | 232 | Y |
| Wu 2011           |                                                                        |                                                                                   |           |   |     |       |       |     |     |   |
|                   | DIET: HighFat,<br>LowFat                                               | Individuals after completing a high<br>fat or low fat diet intervention           | Diet      |   | 10  | 292   | 1769  | 361 | 136 | N |
|                   | AGE                                                                    | Infants (up to Age 3) from the US                                                 | Age       | X | 49  | 4660  | 15783 | 402 | 154 | N |
|                   | COUNTRY:<br>GAZ:Venezuela,<br>GAZ:Malawi                               | Individuals living in Malawi or<br>Venezuela                                      | Geography |   | 54  | 4660  | 15783 | 1   | 4   | N |
|                   | SEX: male, female                                                      | Males and females from the US                                                     | Gender    |   | 129 | 4660  | 15783 | 402 | 154 | N |
|                   | COUNTRY:<br>GAZ:United States<br>of America,<br>GAZ:Malawi             | Individuals living in the US or<br>Malawi                                         | Geography |   | 150 | 4660  | 15783 | 1   | 4   | N |

1  
2  
3  
4 **Figure Legends**  
5  
6  
7

8 **Figure 1. Data processing workflow and website generation.**  
9

10 (A) Quality-filtered sequences were obtained from either the QIITA or from another public  
11 repository and trimmed and filtered using SHI7. Reference-based OTUs were picked  
12 using BURST with the NCBI RefSeq and Greengenes 97 databases.  
13  
14  
15  
16  
17

18 (B) Individual GitHub Markdown pages were generated from dataset and task lists with a  
19 custom Python script and Jinja2 template, then uploaded to GitHub to be hosted.  
20  
21  
22  
23  
24  
25  
26

27 **Figure 2. Screenshots of ML Repo web interface.**  
28

29 (A) Available classification and regression tasks are listed by high level phenotype categories  
30 for browsing.  
31  
32  
33  
34

35 (B) Individual task webpages contain links to files for classifying a specific task, as well as  
36 relevant task-specific metadata.  
37  
38  
39

40 (C) Individual dataset webpages contain relevant metadata pertaining to the entire dataset, as  
41 well as links to raw metadata files and sequencing data.  
42  
43  
44  
45  
46  
47

48 **Figure 3. ROCs comparing random forest and SVM with different kernels.**  
49

50 Sweeping across all binary classification tasks available in ML Repo (28), we compare ROCs of  
51 random forest, SVM with a radial kernel, and SVM with a linear kernel. AUCs are listed within  
52 plots and are colored respective to each model.  
53  
54  
55  
56  
57  
58  
59  
60  
61  
62  
63  
64  
65

1  
2  
3  
4 **Figure 4. Summary statistics of framework and database comparisons.**  
5

6  
7 (A) AUCs random forest (rf) to SVM-Linear (left) and random forest to SVM-Radial (right).  
8

9 Paired t-tests reveal that random forest results in significantly higher AUC than both  
10 SVM-Linear (P=0.0014) and SVM-Radial (P=0.00032).  
11  
12

13  
14 (B) Accuracies of random forest to SVM-Linear (left) and random forest to SVM-Radial  
15 (right). Paired t-tests reveal that random forest results in significantly better accuracy than  
16 SVM-Radial (P=0.03), but not SVM-Linear (P=0.083).  
17  
18  
19

20  
21 (C) AUCs (left) and accuracies (right) of random forest classifications of 24 tasks using  
22 OTUs picked with NCBI RefSeq database or Greengenes database as predictors.  
23  
24 Student's t-test reveals that reference database choice has limited impact on classification  
25 AUC or accuracy.  
26  
27  
28  
29

30  
31 Lines are colored by the top model for each classification task.  
32  
33  
34  
35  
36  
37

38 **Figure 5. ROCs comparing NCBI RefSeq and Greengenes 97 databases.**  
39

40 Sweeping across 16s-based binary classification tasks available in ML Repo (24), we compare  
41 ROCs of random forest with genus-level taxonomic summaries as predictors from OTU-picking  
42 strategies with the NCBI RefSeq prokaryote reference database and the Greengenes 97 reference  
43 database. AUCs are listed within plots and are colored respective to each database.  
44  
45  
46  
47  
48  
49  
50  
51  
52  
53  
54  
55  
56  
57  
58  
59  
60  
61  
62  
63  
64  
65

**A**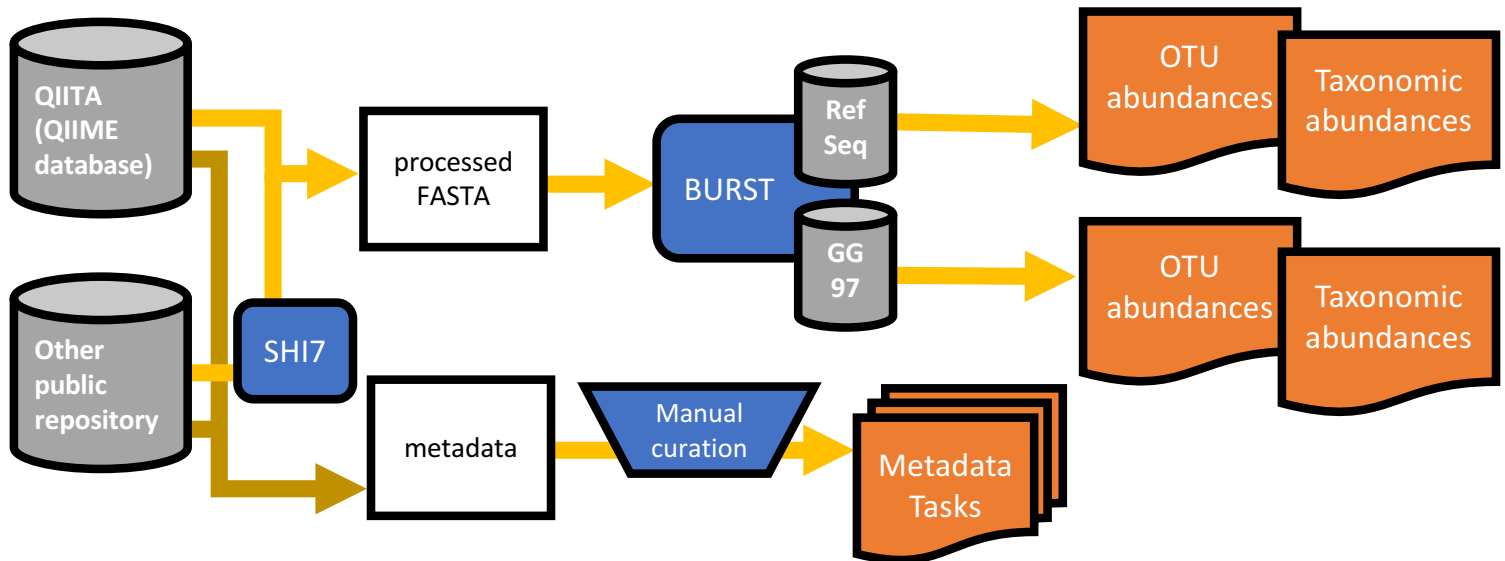**B**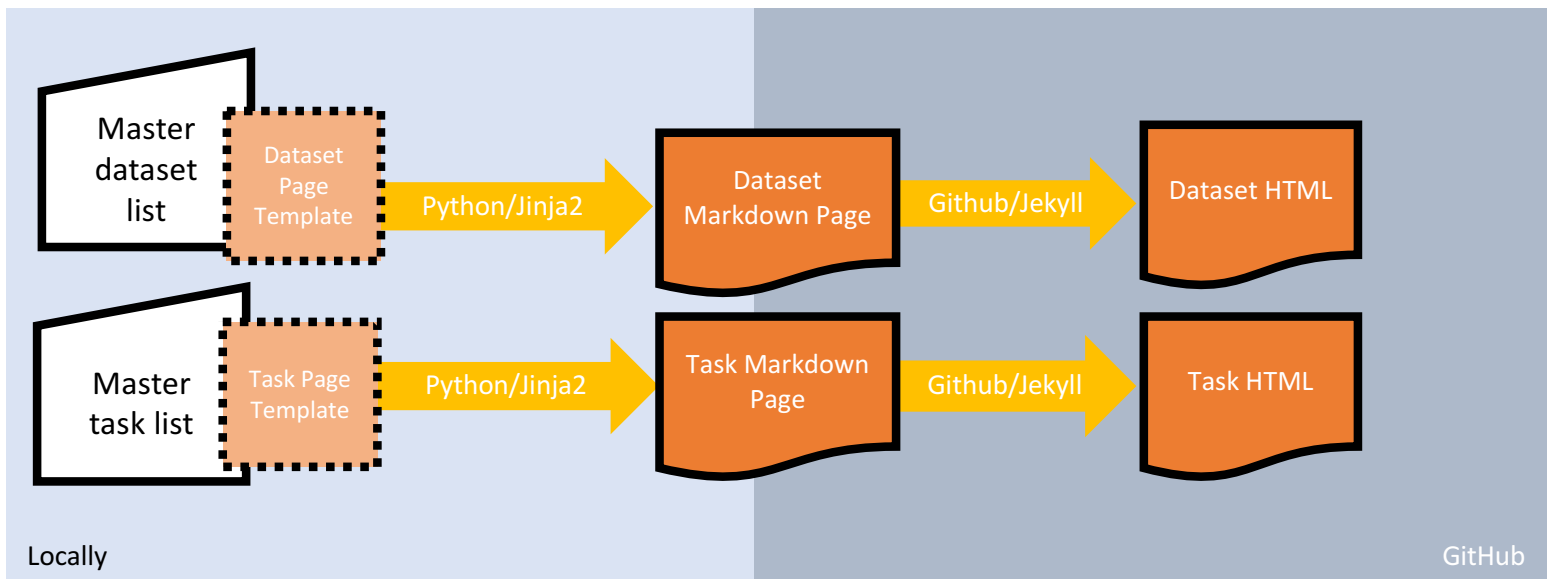

A

**MLRepo**  
Machine learning repository for microbiome datasets

[View On GitHub](#)

**Available Tasks**

- Bacteremia
  - Diet
- Antibiotics
  - Age
  - IBD
  - Gender
  - Vaginal
- Geography
- Body Habitat
- Cancer
- Obesity
- Diabetes
- Cirrhosis

**Available Tasks**

[Download a single file containing all available tasks](#)

**Bacteremia**

- [bacteremia vs no bacteremia](#)

**Diet**

- [high fat vs low fat diet](#)
- [animal vs plant diet, last diet day](#)

**Antibiotics**

- [chlortetracycline vs control, cecal](#)
- [chlortetracycline vs control, fecal](#)

B

**Task: bacteremia vs no bacteremia**

Patients prior to chemotherapy who did or did not develop bacteremia

|                               |                               |
|-------------------------------|-------------------------------|
| Project                       | Montassier 2016               |
| Topic area                    | Bacteremia                    |
| Sample type                   | human stool                   |
| Number of samples             | 28                            |
| Response type                 | binary                        |
| Additional task details       |                               |
| Multiple samples per subject? | No                            |
| Task mapping file             | <a href="#">task.txt</a>      |
| OTU file <i>gg97</i>          | <a href="#">otutable.txt</a>  |
| Taxa file <i>gg97</i>         | <a href="#">taxatable.txt</a> |
| OTU file <i>RefSeq</i>        | <a href="#">otutable.txt</a>  |
| Taxa file <i>RefSeq</i>       | <a href="#">taxatable.txt</a> |

[back to task index](#)

C

**Montassier 2016**

Patients prior to chemotherapy who did or did not develop bacteremia

**Overview**

|                    |                                                                      |
|--------------------|----------------------------------------------------------------------|
| Description        | Patients prior to chemotherapy who did or did not develop bacteremia |
| Study design       | Cross-Sectional                                                      |
| Topic area         | Bacteremia                                                           |
| Attributes         | Treatment: NObact, bact                                              |
| Dataset notes      |                                                                      |
| Number of samples  | 28                                                                   |
| Number of subjects | 28                                                                   |

**Other Details**

|                                          |                                                                                                         |
|------------------------------------------|---------------------------------------------------------------------------------------------------------|
| 16s hypervariable region                 | V56                                                                                                     |
| Targeted amplicon size                   | 280                                                                                                     |
| Sequencing technology                    | 454                                                                                                     |
| Fraction of sequences mapped to database |                                                                                                         |
| Processed sequences                      | <a href="#">montassier2016.fasta.gz</a>                                                                 |
| Raw metadata file                        | <a href="#">mapping-orig.txt</a>                                                                        |
| Raw sequence source                      | <a href="https://www.ncbi.nlm.nih.gov/sra/SRX733464">https://www.ncbi.nlm.nih.gov/sra/SRX733464</a>     |
| Literature source                        | <a href="https://www.ncbi.nlm.nih.gov/pubmed/27121964">https://www.ncbi.nlm.nih.gov/pubmed/27121964</a> |

[back to task index](#)



Figure 3

[Click here to access/download;Figure;MLRepo Figure 3.pdf](#)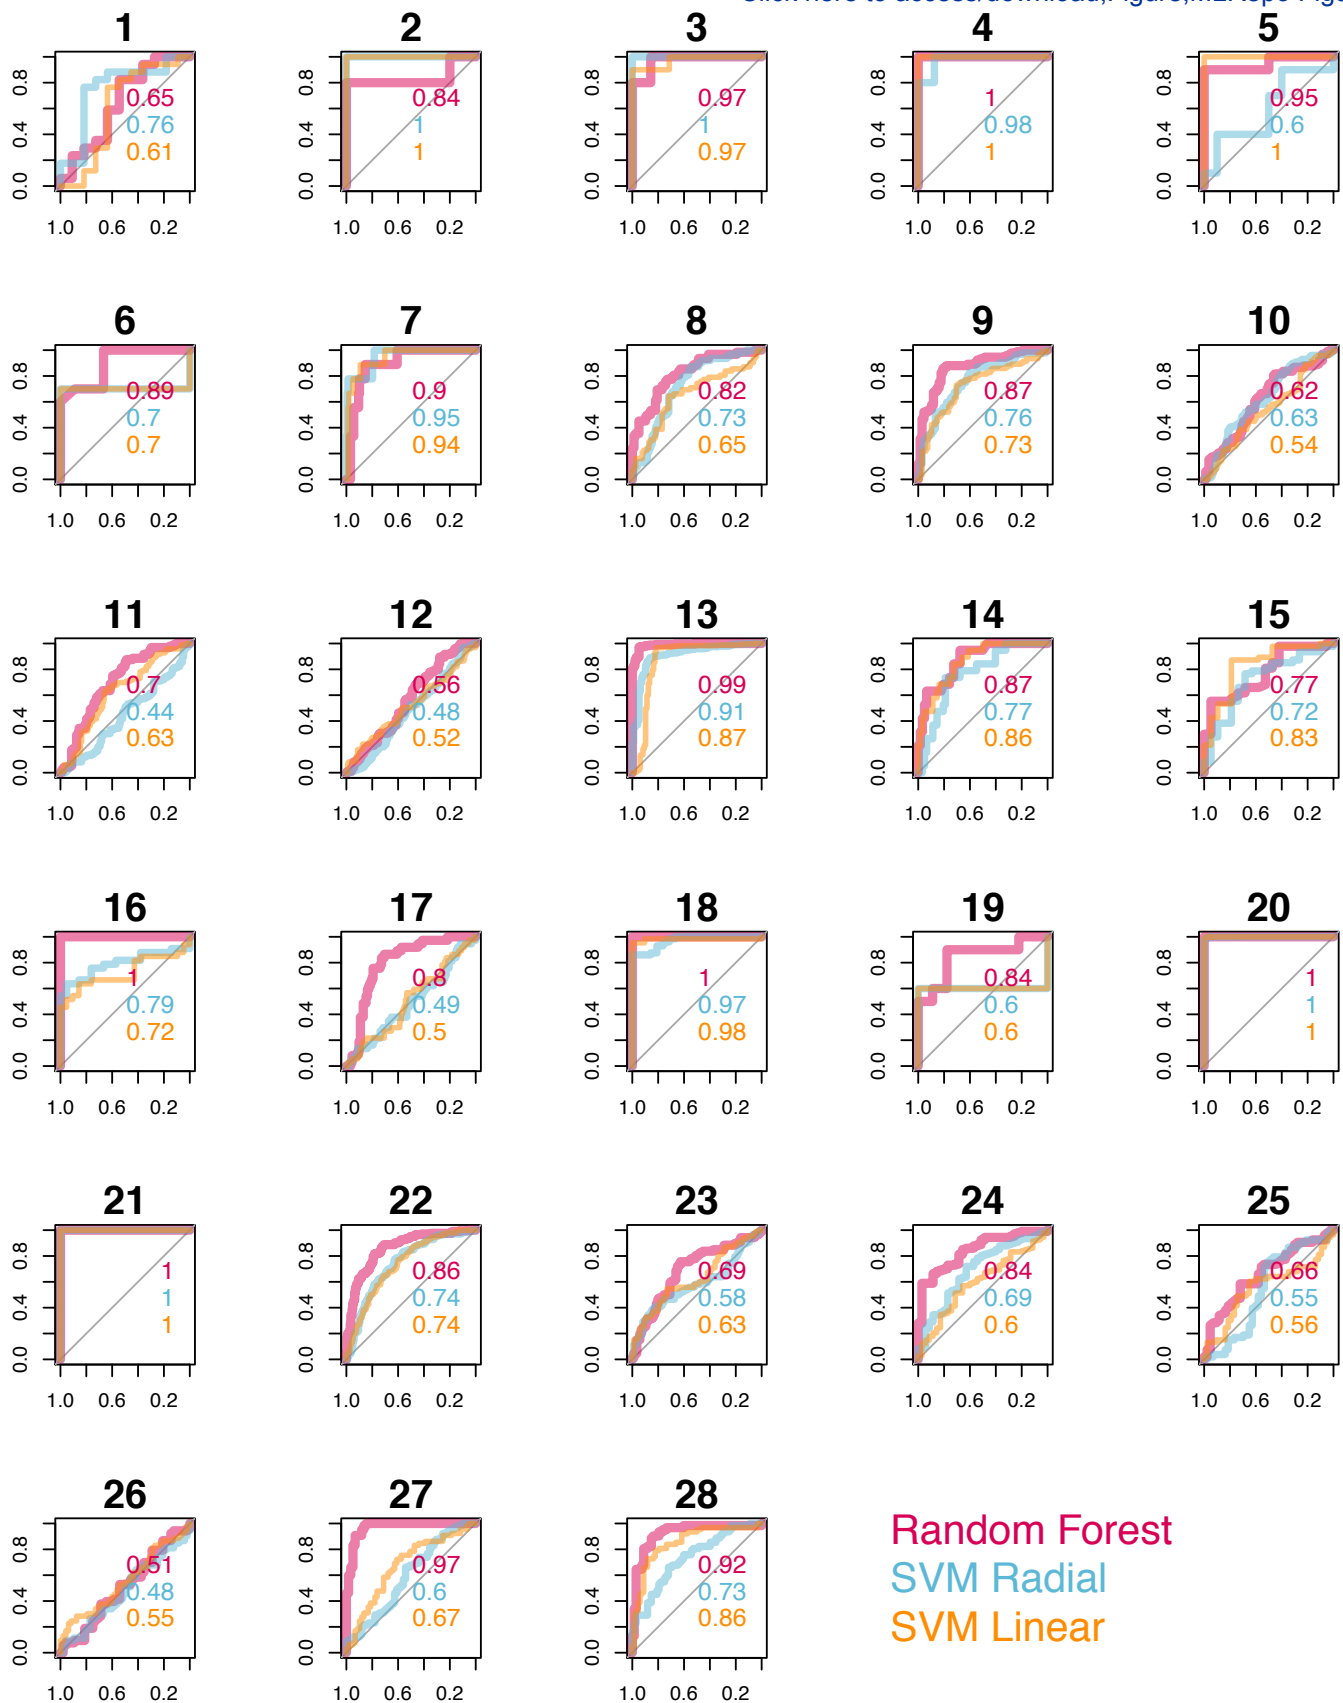

- |                                       |                                        |                                           |
|---------------------------------------|----------------------------------------|-------------------------------------------|
| 1 bacteremia vs no bacteremia         | 11 white vs black, vaginal             | 21 stool vs tongue                        |
| 2 high fat vs low fat diet            | 12 black vs hispanic, vaginal          | 22 subgingival vs supragingival plaque    |
| 3 chlortetracycline vs control, cecal | 13 low vs high nugent category         | 23 healthy vs tumor biopsy, paired        |
| 4 chlortetracycline vs control, fecal | 14 healthy vs cd, stool                | 24 lean vs obese, mz/dz/mom               |
| 5 penicillin vs vancomycin, cecal     | 15 healthy vs uc, stool                | 25 normal vs diabetes glucose tolerance   |
| 6 penicillin vs vancomycin, fecal     | 16 malawi vs venezuela, adults only    | 26 impaired vs diabetes glucose tolerance |
| 7 elderly vs young                    | 17 male vs female, usa                 | 27 healthy vs type 2 diabetes             |
| 8 control vs cd, ileum                | 18 us vs malawi, adults only           | 28 healthy vs cirrhosis                   |
| 9 control vs cd, rectum               | 19 animal vs plant diet, last diet day |                                           |
| 10 male vs female, stool              | 20 gastrointestinal vs oral            |                                           |

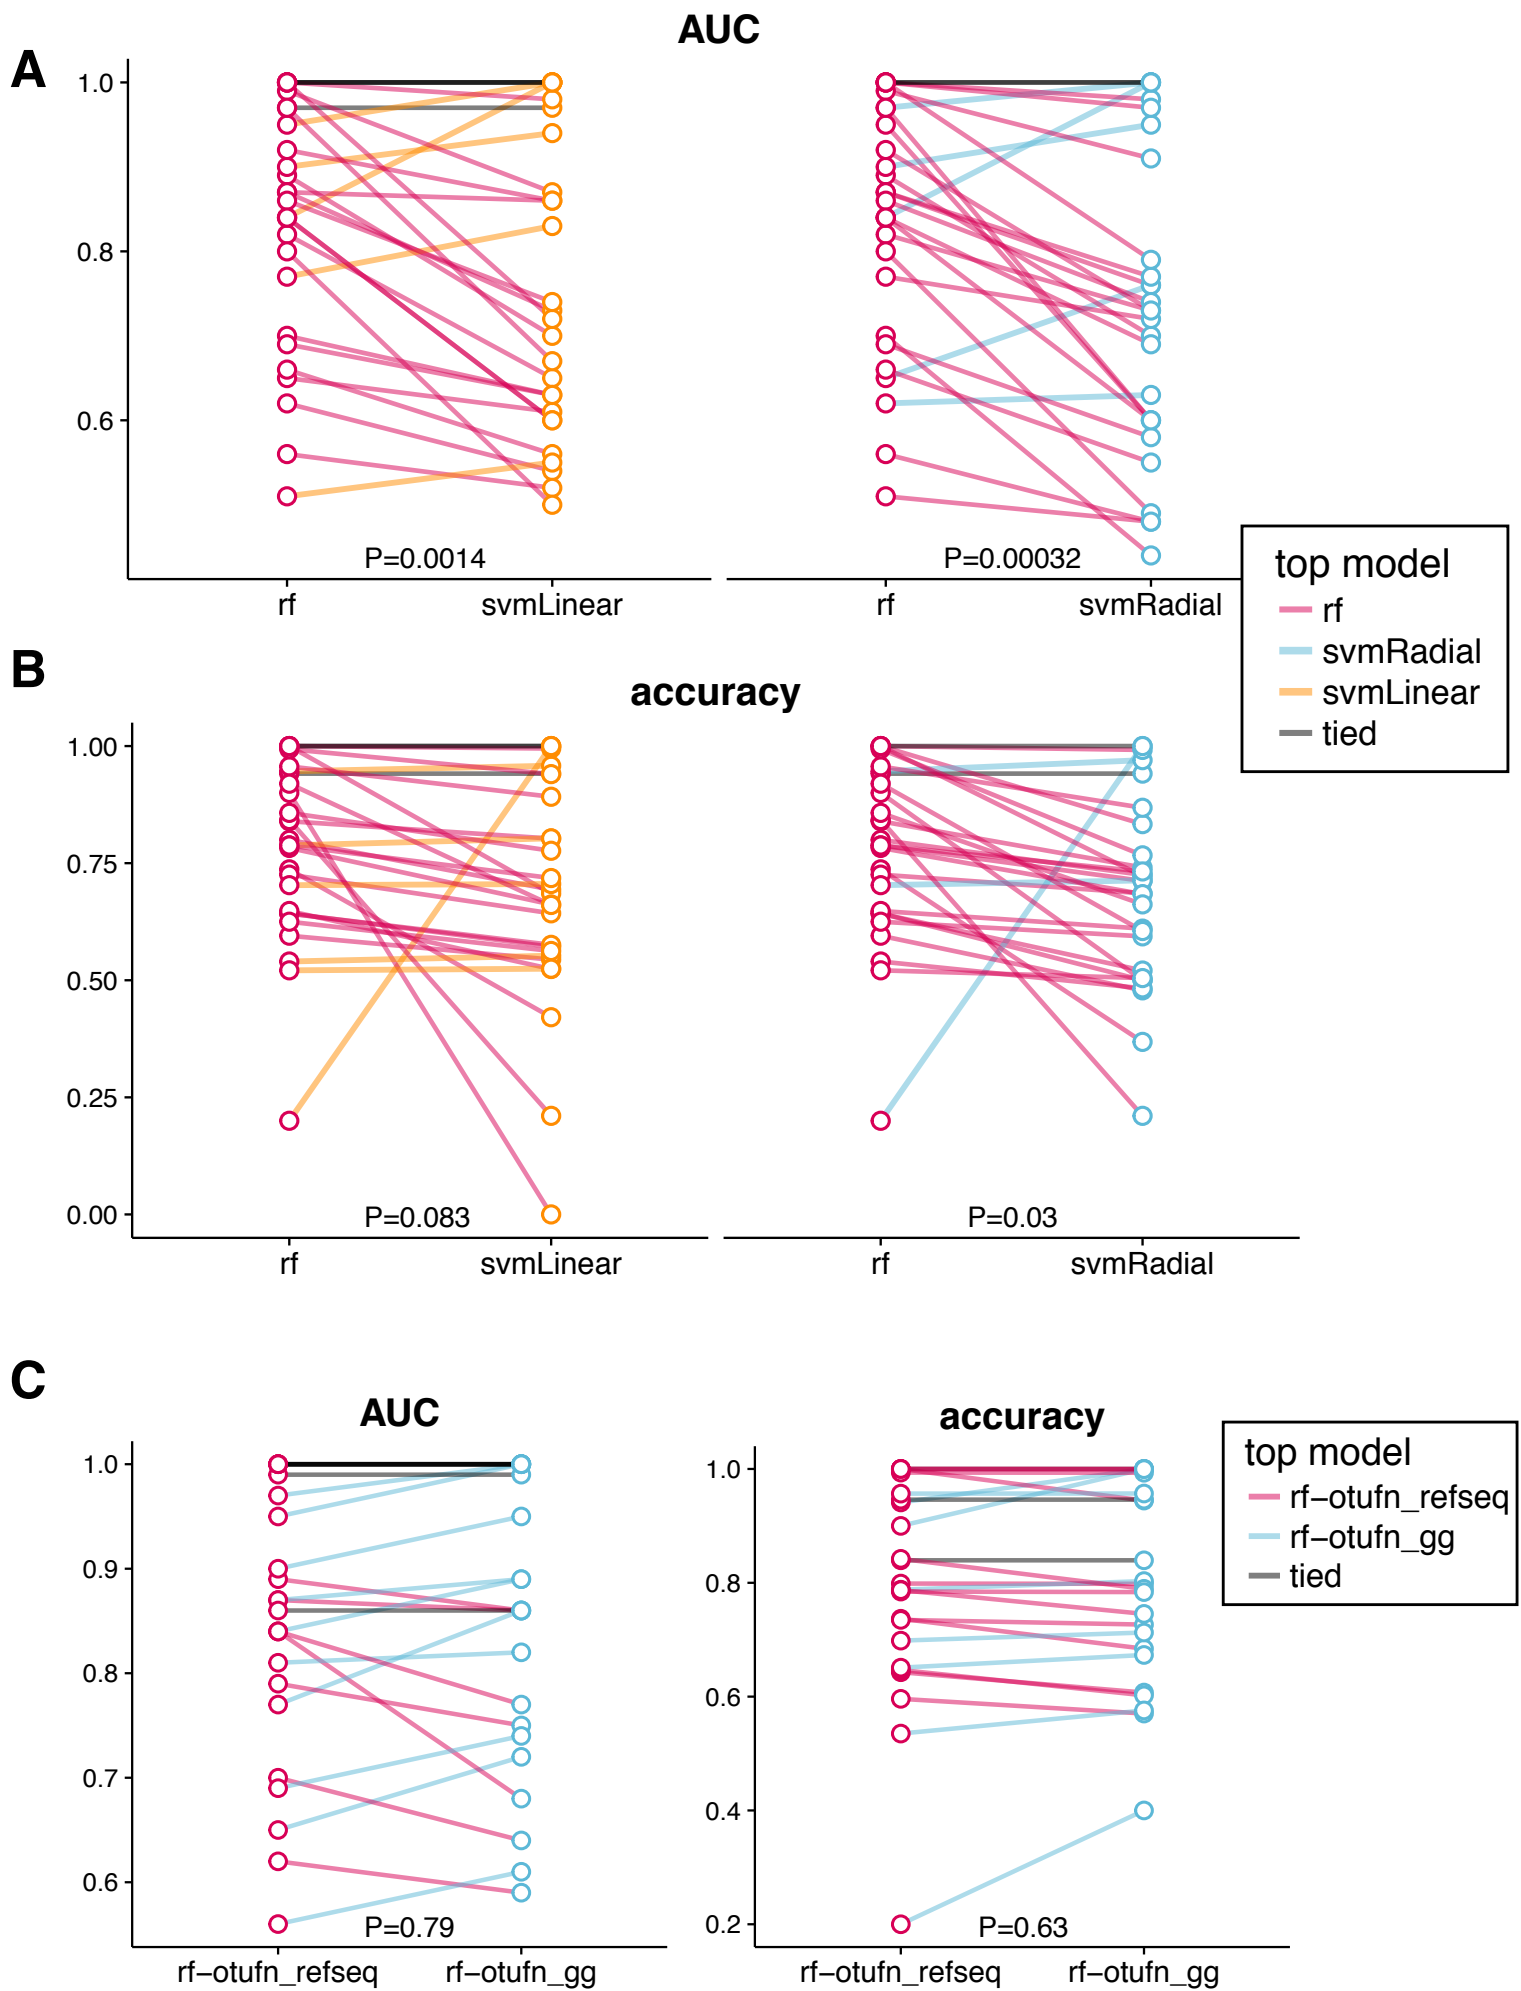

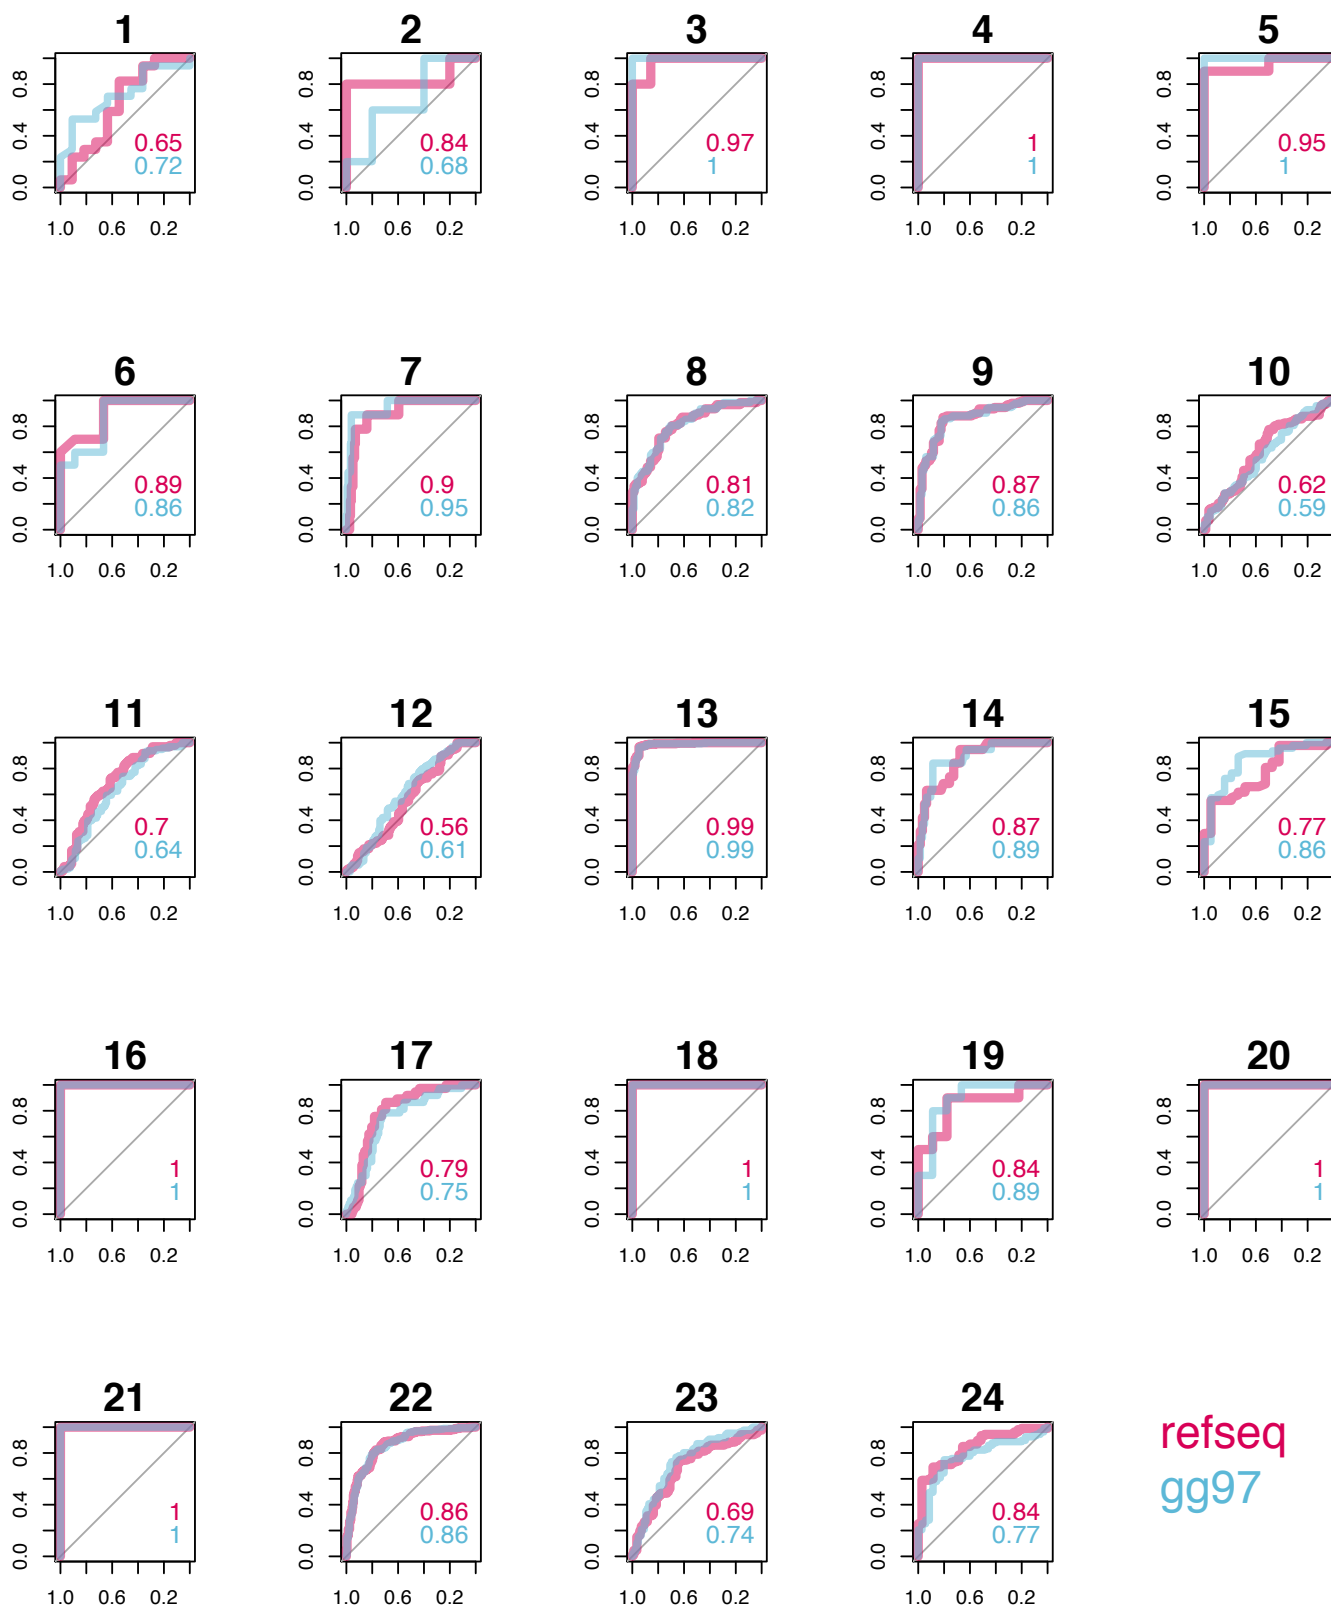

refseq  
gg97

- |                                       |                                        |
|---------------------------------------|----------------------------------------|
| 1 bacteremia vs no bacteremia         | 13 low vs high nugent category         |
| 2 high fat vs low fat diet            | 14 healthy vs cd, stool                |
| 3 chlortetracycline vs control, cecal | 15 healthy vs uc, stool                |
| 4 chlortetracycline vs control, fecal | 16 malawi vs venezuela, adults only    |
| 5 penicillin vs vancomycin, cecal     | 17 male vs female, usa                 |
| 6 penicillin vs vancomycin, fecal     | 18 us vs malawi, adults only           |
| 7 elderly vs young                    | 19 animal vs plant diet, last diet day |
| 8 control vs cd, ileum                | 20 gastrointestinal vs oral            |
| 9 control vs cd, rectum               | 21 stool vs tongue                     |
| 10 male vs female, stool              | 22 subgingival vs supragingival plaque |
| 11 white vs black, vaginal            | 23 healthy vs tumor biopsy, paired     |
| 12 black vs hispanic, vaginal         | 24 lean vs obese, mz/dz/mom            |

# UNIVERSITY OF MINNESOTA

---

*Twin Cities Campus*

*Biotechnology Institute  
College of Biological Sciences*

*420 Washington Ave SE  
Minneapolis, MN 55455*

February 24, 2019

Laurie Goodman, PhD  
Editor in Chief, GigaScience

Dear Dr. Goodman and GigaScience Editorial Board,

We are pleased to submit our revised manuscript entitled “MLrepo: A public repository of microbiome regression and classification tasks” for your consideration for publication in *GigaScience*.

We are extremely grateful to the reviewers for their detailed commentary and suggestions, and for their very positive response to the manuscript overall. We have revised the manuscript extensively in accordance with reviewer suggestions, and we believe it substantially improved and is ready for publication.

We hope you will find this a valuable publication and resource to be shared with the GigaScience readership. Thank you in advance for your consideration. We look forward to your response. Please do not hesitate to contact us with any questions about the manuscript.

Yours Sincerely,

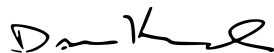

Dan Knights  
Associate Professor  
University of Minnesota

## Response to Reviewers

### Reviewer #1:

This paper describes MLRepo, a database of standardized microbiome datasets to develop and evaluate machine learning algorithms. The strength of this resource is to provide machine learning researchers a panel of diverse datasets (e.g., regression and classification tasks of various levels of complexity and with a various number of samples), already curated and formatted, to evaluate in an objective way novel algorithms dedicated to the analysis of microbiome samples. It can also be useful for teaching purposes (e.g., for practical lab sessions or to set up "data challenges") and will obviously be valuable to the community of microbiome researchers to set-up meta-analyses.

Overall I am very enthusiastic about this repository. As a machine-learning method developer interested in microbiome / metagenomics applications, I am indeed well aware that building curated databases and setting up baselines to evaluate novel algorithms is very time consuming, and that results reported in published papers are sometimes hard to reproduce. I am therefore convinced that this repository will simplify the whole process and facilitate evaluating algorithms in an objective way. I am therefore very favorable in having this work published in Giga Science.

*We thank Reviewer 1 for the enthusiasm, and are pleased that the reviewer thinks the manuscript will be important to the field.*

My main comment comes as a suggestion. While the paper is relatively easy to follow for someone already aware of microbiome / metagenomics studies, some additional information may be useful to users of the database not familiar (at all) with metagenomics data. In particular (i) a glossary of technical terms specific to (meta)genomics data and analysis (e.g., OTU, 16s, fasta/fastq), and

*We thank Reviewer 1 for this suggestion. We have added the following glossary to our manuscript:*

|              |                                                                                                                               |
|--------------|-------------------------------------------------------------------------------------------------------------------------------|
| <b>OTU</b>   | <i>Operational Taxonomic Unit, group of closely related organisms based on DNA sequence similarity.</i>                       |
| <b>16S</b>   | <i>16S ribosomal RNA gene, component of the prokaryotic ribosome, used to reconstruct phylogenies.</i>                        |
| <b>FASTA</b> | <i>Text-based format for representing nucleotide sequences with single-letter codes.</i>                                      |
| <b>FASTQ</b> | <i>Text-based format for representing nucleotide sequences and corresponding quality scores, with single-letter codes for</i> |

*nucleotides and quality.*

|                 |                                                                                                                                                                                                                                                                     |
|-----------------|---------------------------------------------------------------------------------------------------------------------------------------------------------------------------------------------------------------------------------------------------------------------|
| <i>Taxa</i>     | <i>Groups of one or more populations of organisms. Usually summarized at phylum, class, order, family, genus, or species levels.</i>                                                                                                                                |
| <i>Metadata</i> | <i>Descriptive data pertaining to samples within a study</i>                                                                                                                                                                                                        |
| <i>Shotgun</i>  | <i>Shotgun metagenomics sequencing breaks up all available DNA into random small segments and uses chain termination to sequence reads. Reads can be aligned directly to a reference database, or overlapping reads can be assembled into contiguous sequences.</i> |

(ii) some additional details regarding the format of the data provided, especially the taxonomic information provided in the "taxatable" files. In the same spirit, it could be interesting to highlight an important specificity of microbiome data, namely that the input variables (taxa/OTUS) are ordered in a hierarchy. Dedicated machine learning methods exist (or could be developed) to take into account this type of data. Altogether, this could further motivate machine learning researchers interested in the analysis of structured data to use this repository.

*We thank the reviewer for this suggestion and agree that the count table formats deserves more detail. We have added the following lines to the manuscript:*

*These counts are presented in tables that are organized as follows: OTUs or taxa as rows, and samples as columns. OTUs are represented as either NCBI genome identifiers or Greengenes identifiers. Taxa are represented as "kingdom; phylum; class; order; family; genus; species; strain", with highest taxonomic specificity where possible.*

Besides this general comment, I have a few questions that may deserve some clarifications in the main text :

\* It is mentioned in page 3 that "full details regarding the data processing are provided for each dataset in the repository", but I am not sure to find them.

*We apologize for the lack of detail here. We have updated this line to include details for where to find these preprocessing steps:*

*Full details regarding the data preprocessing are provided for each data set in the mlrepo-source branch of the GitHub repository, under preprocessing/make.mappings.r.*

\* I am not sure to understand what is meant by "samples with depths lower than 1000 sequences per samples were dropped". Do these 1000 sequences correspond to reads ? or to contigs ?

*We apologize for the lack of clarity here, and would like to clarify that “1000 sequences” corresponds to sequencing reads. We dropped samples that contain less than a total of 1000 sequencing reads for 10 datasets, and less than a total of 100 sequencing reads for 5 datasets. The different thresholds were applied based on the expected bacterial load of the sample types (e.g. colon biopsies are expected to have lower biomass than stool). We have updated the text as follows:*

*Samples with depths lower than 1000 [sequencing reads](#) per sample were dropped for n=10 datasets, while we applied a lower threshold of 100 [sequencing reads](#) per sample for n=5 datasets which had lower expected bacterial load.*

\* This may be obvious but I am not sure to understand how are defined OTUs from shotgun sequencing data. Are they based on the 16s gene only or is the entire genome used somehow?

*We apologize for the lack of clarity. Shotgun sequencing data uses all of the available sequencing reads within a sample to identify the genomes that are present. We did not construct contigs, but instead mapped the sequencing reads directly to the reference database, which is composed of full genomes from the NCBI RefSeq prokaryote database. We have added the following text to the glossary:*

*Shotgun metagenomics sequencing breaks up all available DNA into random small segments and uses chain termination to sequence reads. Reads can be aligned directly to a reference database, or overlapping reads can be assembled into contigs.*

\* It is mentioned in page 3 that (i) "confounders were removed by dropping samples or stratification and (ii) "well-known confounders [...] were accounted for when constructing prediction tasks". Could the authors be more specific about these (important) steps ?

*We thank the reviewer for this excellent question. We have updated the text to better explain how we subset samples to address confounders. We have also provided the location of the R script that shows how we processed each original metadata file.*

*Well-known confounders were accounted for when constructing prediction tasks for other human-associated conditions; for example, predicting age using the Yatsunenko 2012 dataset is restricted to samples from the U.S. due to the known variation in gut microbiomes across different geographical locations. Details of how samples were subsetted for each prediction task can be found in the mlrepo-source branch of the GitHub repository, under preprocessing/make.mappings.r.*

\* In the same spirit, it is mentioned just after (top of page 4) that "confounders variables to control for" are reported in the tasks' metadata. This is indeed very valuable for the analysis and important to take into account. This is well explained in the Methods section, but I think it could be stressed in the main text (maybe simply by explicitly referring to the Methods section at this point).

*We thank the reviewer for this suggestion and agree that more detail should be provided. We have updated the text as follows:*

*Hence, each prediction task is made available as an individual, compartmentalized metadata file that contains sample identifiers, responses to predict, and optionally, confounder variables that are inherent to the research study design such as paired healthy and diseased samples from the same subject (see Methods for more details).*

\* In the case study, it could be interesting to comment why RFs tend to do better than SVMs according to AUC but not accuracy.

*We thank the reviewer for this suggestion. We have added an explanation to the text as follows:*

*We found that random forest accuracy improvements were moderate when compared with SVM-Linear ( $P=0.083$ ) and SVM-Radial ( $P=0.03$ ) [Fig 4B], which may be explained by the fact that, unlike AUC, accuracy ignores class prediction probability estimates.*

\* Since I assume that the number of OTUs will vary according to the nature of the samples (e.g., fewer in vaginal samples than stool samples), it could be interesting to mention in Table 1 the number of features involved in the various tasks. It could also be interesting to mention in this table whether the task involves classification or regression.

*We thank the reviewer for this excellent suggestion and have added an additional table (Table 2) that describes the prediction tasks, which includes the number of samples, number of features, and the response type, as seen below. A more detailed version of this table with additional columns of metadata is also available on GitHub under [web/data/tasks.txt](#). Note that the number of features are provided on a per-dataset basis, and not on a per-task or per-attribute basis. Microbiome abundance tables inherently contain a superset of OTUs/Taxa found across all samples within a study, and we chose to leave these tables largely intact so that the end-user can have maximum flexibility in generating new prediction tasks from the original mapping file.*

\* Page 6 , lines 150-153. Could we simply say that this suggests that the OTU definitions made from GreenGenes and NCBI are consistent or is it more subtle? A comment on the respective merits (if any) of the two approaches (e.g., on the number of OTUs involved or in their level of taxonomic resolution) would be useful.

*We thank the reviewer for this observation, and have added text to address the noted differences between these two references databases.*

*Note that OTU-picking against the Greengenes database resulted in more OTU features in every dataset [Table 2], hence, these findings may also highlight how the smaller,*



*higher-quality NCBI RefSeq database can recover the same signal from the larger Greengenes database.*

- \* I assume that the operation consisting in "collapsing OTUs at a complete-linkage correlation of 95%" mentioned in the Methods section (page 8, line 194) has something to do with "cutting" a dendrogram built from the OTU correlation matrix. Could the authors be a bit more specific ?

*We apologize for the lack of clarity and have added additional text to this sentence to detail the steps taken to collapse correlated OTUs:*

*...collapsed at a complete-linkage correlation of 95% (which is done by calculating the Pearson's correlation between each pair of OTUs using all complete pairs of observations, hierarchically clustering the results, and cutting the resulting dendrogram at a height of 0.05).*

- \* For the sake of completeness, I think it would be worth detailing a bit more in the "case study benchmarking" section how were optimized the hyper-parameters of the machine learning algorithms considered (namely the regularization parameter for the SVMs, the bandwidth of the kernel for the radial-SVM and the number of trees for the RF). For instance : which grids of parameter values were considered, whether there was some kind of "nested" cross-validation to optimize the parameters before predicting the data for the held-out data, and on which criterion (e.g., accuracy or AUC) was/were chosen the optimal parameter(s).

*We thank the reviewer for pointing this out. We did not perform hyper-parameter optimization, nor grid-searching. We have updated the manuscript text to better describe the model parameter settings as follows:*

*Control parameters were set using the function trainControl with parameter method = 'none' and default parameters. Default settings for all models are as follows: SVM radial basis sigma is set to .1, all SVMs C is set to 1, and randomForest number of trees is set to 500 and number of variables to split is  $\sqrt{p}$ , where  $p$  is the number of features.*

Minor comments and typos :

- \* Page 1, line 16 : exist

*Thank you for noting this. We have made this change:*

*Unfortunately, challenges still exist for machine learning algorithm developers who often lack domain expertise required for interpretation and curation of the heterogeneous microbiome datasets.*

- \* Page 2 , line 38 : the term "parse" is vague.

*We have changed "parse" to "interpret", as follows:*

*In addition, microbiome research data can be challenging to access and analyze for expert machine learning algorithm developers, who often do not have the domain expertise required to [interpret](#) the data and metadata in complex microbiome studies.*

- \* Page 2, line 43 : "specifically for" may be replaced by "specific to" or "dedicated to"

*We have changed "specifically for" to "dedicated to", as follows:*

*Currently, we are unaware of any machine learning repository [dedicated to](#) microbiome classification tasks.*

- \* Page 2, line 50 : "using" --> "involving" ; "curated" -->"derived"

*We have made the suggested changes, and the updated text is now:*

*We present the Microbiome Learning Repo (ML Repo), a repository of 33 curated classification and regression tasks [involving](#) human microbiome data. Our 33 tasks are [derived](#) from 15 publicly available human microbiome datasets, which include 12 amplicon-based and 3 shotgun sequencing datasets [Table 1].*

- \* Page 3, line 53 : "developer" --> "developers"

*We have made the suggested change:*

*These datasets vary across sequencing technology platforms, 16s hypervariable regions, and study design, in order to help [developers](#) ensure robustness of algorithms across data types.*

- \* Page 4, line 86 : "methods developers" --> "method developers" (for consistency with "machine learning algorithm developers" used several times before)

*We have made the suggested change:*

*Generally, we expect that [method](#) developers will be most interested in sweeping through the full set of prediction tasks for benchmarking, and hence would prefer to download a single compressed file containing all tasks and data.*

- \* Page 4, line 96 : "Sample Size and Response Type" --> "sample size and response type"

*We have made the suggested change:*

*Task pages contain descriptive details such as [sample size and response type](#) that are specific to the selected prediction task, as well as links for downloading OTU tables, taxa tables, and sample metadata [Fig 2B].*

- \* Page 5, line 115 : the term "nuances" is vague

*We apologize for the lack of clarity here, and have updated the text as follows:*

*The subsetted samples found in each prediction task metadata file replaces the work of rigorously deciphering metadata and understanding the subtle differences of individual research studies.*

**Reviewer #2:**

The paper by Vangay et al. presents "ML Repo", a public repository of microbiome datasets for conducting regression and classification analysis based on machine learning approaches. The repository is a web-based service and includes currently 33 curated classification and regression tasks from 15 published human microbiome datasets. The authors presents several use cases to demonstrate its wide application. The topic involved in the paper is suitable for publication in the GigaScience journal. The manuscript is well written and well structured. In general, the paper is a nice contribution for the microbiome community.

*We thank the reviewer for these comments and are pleased that the reviewer finds that our manuscript will be a contribution to the community.*

However, I have some comments before a possible publication:

1. The novelty of the proposed repository needs to be better described. In particular, they authors missed to cite two recent and in some way similar repositories:
  - i. The "MicrobiomeHD" database, mainly for 16S studies: "Duvalllet, Claire, Sean M. Gibbons, Thomas Gurry, Rafael A. Irizarry, and Eric J. Alm. "Meta-analysis of gut microbiome studies identifies disease-specific and shared responses." Nature communications 8, no. 1 (2017): 1784."
  - ii. The "curatedMetagenomicData" database, mainly for shotgun studies: "Pasolli, Edoardo, Lucas Schiffer, Paolo Manghi, Audrey Renson, Valerie Obenchain, Duy Tin Truong, Francesco Beghini et al. "Accessible, curated metagenomic data through ExperimentHub." Nature methods 14, no. 11 (2017): 1023."

I think these two contributions should be added in the section "Comparison to similar databases" and novelties of the proposed repository with respect to them properly discussed.

*We thank the reviewer for excellent suggestion of adding these two papers, and apologize for not including them previously. We have added the following text in the section "Comparison to similar databases":*

*Microbiome-based repositories that do provide manually curated metadata include curatedMetagenomicData and MicrobiomeHD. Although curatedMetagenomicData offers a collection of shotgun-metagenomics datasets with varying human sample types with gene, pathway, and taxonomic abundance tables, its data are accessible only via Bioconductor and are stored as ExpressionSet objects, which integrates metadata and abundance data. Although curatedMetagenomicData is an impressive repository with many features, it is most suitable for advanced bioinformaticians as its interface may hinder use by beginner data analysts and in teaching environments. MicrobiomeHD*

*offers easily accessible taxonomic abundance tables with curated metadata, but is limited only to amplicon-based sequencing data, human stool samples, and case-control responses. And although both curatedMetagenomicData and MicrobiomeHD provide manually curated metadata, biological interpretation is still required as other sample metadata, for example antibiotic usage, may have biological relevance in predicting responses. This poses a potential problem for machine learning developers with limited biological and microbiome domain expertise. MLRepo resolves this issue by explicitly defining classification and regressions tasks for predicting responses that have been manually curated to either remove confounders or have been specifically annotated with biological confounders that must be controlled for. Metadata files in MLRepo are task-specific, and hence, are simplified to contain only: (1) sample identifiers indicating samples that should be used for the prediction task, (2) corresponding high-level phenotypes or responses, and optionally, (3) a confounder that should be accounted for due to its biological relevance. In addition, datasets in MLRepo include both amplicon-based and shotgun-metagenomics datasets covering a variety of human sample types, and are easily accessible via a web-interface.*

2. The repository aims at providing metadata for both classification and regression tasks, as explicitly written also in the title. However, from my understanding use cases were reported on classification tasks only. Could you add some example on regression tasks?

*We thank the reviewer for this suggestion. For space limitation reasons we have not added a whole section demonstrating a parameter sweep on the regression tasks. However, our work demonstrates that sweeping across parameters can inform future machine learning development efforts in regression, and we have emphasized the inclusion of regression tasks throughout the manuscript.*

3. Do you expect to add new datasets in the future? Can users contribute to them? Please describe better this aspect in the paper and potentially on the website.

*We do expect to add new datasets in the future, and also allow users to contribute to our repository. We apologize for not making the instructions more explicit. We have updated this section of our manuscript to point to the instructions for adding new datasets. We have provided the contents of <https://github.com/knights-lab/MLRepo/blob/master/add-datasets-readme.md> below (note that when viewed on GitHub, words referring to tools, databases, or GitHub tasks are hyperlinked to respective websites with instructions):*

*Steps for submitting a new dataset and/or task*

- 1. If you have either the raw FASTQ or processed FASTA file, please deposit it into a public repository. We list large files via publicly accessible URLs and do not support uploading of any large files. If you need assistance, please contact us.*

2. *If starting with FASTQ, we recommend processing with SH17 and OTU-picking with BURST, with NCBI RefSeq Prokaryote files and Green genes 97*
3. *Fork our repository.*
4. *Add new tasks and datasets directly into tasks and datasets. Make sure to fill out all sections.*
5. *We expect you to apply rigorous standards in filtering, subsetting, and selecting samples for your classification and regression tasks.*
6. *When ready, submit a pull request for our review.*

*We provide instructions on our GitHub repository (<https://github.com/knights-lab/MLRepo/blob/master/add-datasets-readme.md>) to guide users to create a fork from our repository, add the appropriate data and files, and update the master task and dataset lists.*

4. Line 75: "Well-known confounders, such as geography, were accounted for when constructing prediction tasks for other human-associated conditions". I did not understand how this was really implemented in your analysis.

*We thank the reviewer for pointing this out. We have updated the text below to better explain how we subset samples to address confounders. We have also provided the location of the R script that shows how we processed each original metadata file.*

*Well-known confounders were accounted for when constructing prediction tasks for other human-associated conditions; for example, predicting age using the Yatsunenکو 2012 dataset is restricted to samples from the U.S. due to the known variation in gut microbiomes across different geographical locations. Details of how samples were subsetted for each prediction task can be found in the mlrepo-source branch of the GitHub repository, under preprocessing/make.mappings.r.*

### **Reviewer #3:**

In this contribution the authors present a repository of machine learning tasks, or 'challenges', concerning the prediction of a range of (human) host phenotypes from the composition of (one of) its microbiome(s). Other, non-phenotypical responses are concerned with host geographic location, body habitat, diet or antibiotic treatment. In general, this effort is highly appreciated, since the collection of suitable benchmark datasets and their standardisation is - at least - 50% of the work when developing machine learning (and other, baseline) methods.

The manuscript as a whole is in good shape and I specifically like the figures. My only real concern - and that's where the minor corrections come in - would be the general understandability of the manuscript to a non-microbiome audience, specifically to the envisaged (as one user type) CS-type user. The comparison to the UCI machine learning repository illustrates this concern best: what if a machine learning expert lacking *\_any\_* biological

background (i.e. not a microbiome-bioinformatics nor a bioinformatics but 'merely' an informatics person) was interested in your datasets and would read the paper as an introduction to using the data? Even with a bioinformatics background, while one will generally have heard about most of the basic concepts, it couldn't hurt to be reminded with some short additional explanations in the right places. I try to list those places in the following:

p3,l56: 'We preprocessed raw sequences using...' - what do these tools do i.e. what does 'preprocessing' refer to exactly in this case?

*We apologize for the lack of detail here and have updated the manuscript text to the following:*

*Raw sequences were trimmed and quality filtered using SHI7 [12] or QIIME [13].*

p3,l59: 'We picked Operational Taxonomic Units (OTUs)...' - maybe briefly explain what this is, mainly the difference to the taxa counts

*We thank the reviewer and agree that a definition is warranted. We have created a Glossary where we define OTU as follows:*

*OTU                      Operational Taxonomic Unit, group of closely related organisms based on DNA sequence similarity.*

p3,l72: 'When available, published study exclusion criteria was [were!] applied accordingly...' - an example of such exclusion criteria would explain what you mean in an instant, just like you already do for the confounders

*We thank the reviewer for the suggestion, and have updated the text as follows:*

*When available, published study exclusion criteria, such as reported use of antibiotics, were applied accordingly and confounders were removed by dropping samples or stratification.*

p3,l77: '...to minimize the effect of high intra-individual similarities.' - it's not immediately obvious what you mean here, maybe rephrase? how does longitudinal data come in at all for your type of tasks? from reading it once i had the impression you'd have to select only one time point as the dataset for any given task anyway? i may well be missing a point here, so just make sure you spell it out as simple as you can.

*We apologize for the lack of clarity and have replaced this text. We hope that the following text does a better job of explaining how we reduced the number of samples per subject.*

*Studies that were cross-sectional by design but contained several samples per subject were filtered to contain one sample per subject. In study designs with paired diseased-healthy or pre- and post-intervention samples, samples were reduced to two samples per subject with subject identifiers provided as confounder variables.*

p8,l193: '...collapsed at a complete-linkage correlation of 95%.' - i totally didn't get this, it's definitely st you can save lots of (non-microbiome) people the time to think about by adding a short explanation

*We apologize for the lack of clarification here and have updated the text as follows:*

*...collapsed at a complete-linkage correlation of 95% (which is done by calculating the Pearson's correlation between each pair of OTUs using all complete pairs of observations, hierarchically clustering the results, and cutting the resulting dendrogram at a height of 0.05).*

This may or may not be exhaustive but I hope you do get the general point. I think the necessary additions are rather small, st rephrasing may be sufficient, st just one more sentence. I suppose the 'luxury' solution would be having those amendmends done to the manuscript \_and\_ providing a glossary page on your website, just for the 5-10 relevant terms - but whether or not that additional effort makes sense for you and your target audience is st only you can decide. I would definitely hope that, with the suggest additional explanations, the manuscript and therefore resource may be helpful for a slightly wider audience than without them.

*We greatly appreciate the suggestions that the reviewer has made, and have also added the glossary below to assist with some of these concerns.*

|              |                                                                                                                                                        |
|--------------|--------------------------------------------------------------------------------------------------------------------------------------------------------|
| <i>OTU</i>   | <i>Operational Taxonomic Unit, group of closely related organisms based on DNA sequence similarity.</i>                                                |
| <i>16S</i>   | <i>16S ribosomal RNA gene, component of the prokaryotic ribosome, used to reconstruct phylogenies.</i>                                                 |
| <i>FASTA</i> | <i>Text-based format for representing nucleotide sequences with single-letter codes.</i>                                                               |
| <i>FASTQ</i> | <i>Text-based format for representing nucleotide sequences and corresponding quality scores, with single-letter codes for nucleotides and quality.</i> |
| <i>Taxa</i>  | <i>Groups of one or more populations of organisms. Usually summarized at phylum, class, order, family, genus, or species levels.</i>                   |



|                 |                                                                                                                                                                                                                                                                     |
|-----------------|---------------------------------------------------------------------------------------------------------------------------------------------------------------------------------------------------------------------------------------------------------------------|
| <i>Metadata</i> | <i>Descriptive data pertaining to samples within a study</i>                                                                                                                                                                                                        |
| <i>Shotgun</i>  | <i>Shotgun metagenomics sequencing breaks up all available DNA into random small segments and uses chain termination to sequence reads. Reads can be aligned directly to a reference database, or overlapping reads can be assembled into contiguous sequences.</i> |

Let me finish with some further, random points, in order of appearance:

general 1: Should already the abstract contain a link to your website? It's often done like that.

*We have added the website URL to the abstract:  
We present Microbiome Learning Repo (ML Repo, available at <https://knights-lab.github.io/MLRepo/>), a public, web-based repository of 33 curated classification and regression tasks from 15 published human microbiome datasets.*

general 2: I was wondering whether or not the term 'task' could generally be replaced by 'challenge' to make it more clear?

*We have decided not to change the term 'task' because this term is commonly used in the machine-learning community, especially when referring to prediction tasks, and we want to make the manuscript as accessible as possible to the machine learning community.*

p3,l53: developer -> developers

*This text has been updated as suggested.*

p3,l56: I don't think the 'n=number' style of writing is necessary or in any way beneficial to the reader, so just put the number. This is true for all its occurrences throughout the manuscript.

*We have removed 'n=' throughout the manuscript.*

p3,l62: I may get it wrong but isn't the 'per sample' redundant here? Or do the two 'sample'-s in the first part of the sentence refer to two different things? And what does 'depths' mean? If it's just the number of sequences then 'Samples with less than...' would do the job and make reading easier. This issue recurs at least once below. So fix both in case.

*We have updated the text as follows:*



*Samples with less than 1000 sequencing reads were dropped for 10 datasets, while we applied a lower threshold of 100 sequencing reads per sample for 5 datasets which had lower expected bacterial load.*

p4,l96: You use uppercase very sparingly, can't see why to use it in 'Sample Size and Response Type' here.

*This text has been updated as suggested.*

p5,l105: Use it here, in 'Machine Learning Repository' instead, esp. given you do use it when mentioning this resource first.

*This text has been updated as suggested.*

p5,l114: Can't you just scrap the 'prediction tasks.' here?

*Yes, 'prediction tasks' have been removed from this text.*

p5,l115: replaces -> replace

*This text has been updated as suggested.*

p5,l116: I don't quite understand how the 'Hence...' logically connects this sentence with the preceding one. Like, what have both to do with each other?

*We agree with this observation. We have removed 'Hence' from this text.*

p5,l125: Is it, logically speaking, not already 'for assigning' i.e. when you come up with high-level binary classes that later make your responses for prediction?

*We have added extensive detail to this section describing what features discriminate ML Repo from, and make it more amenable to use by machine learning experts than, other efforts to collate microbiome data.*

p6,l140: Here you comment on AUC being generally accepted etc, however, you already use it (without such a comment) earlier in the same para. Maybe revise slightly.

*We thank the reviewer for pointing this out. We have moved this comment to the first mention of AUC, as follows:*

*Sweeping through available tasks with binary responses, we compare our models by examining receiver operating curves (ROCs) and areas under the curve (AUC), considered the standard method for machine learning model evaluation [23,24] [Fig 3].*

p7,l160: This needs rephrasing! Right now you 'accept and merge' the actual researchers into your repo - they may not like this :)

*We apologize for this incorrect phrasing. We have updated the text as follows:  
Researchers can then submit a pull request for our review, and requests that are properly formatted will be accepted and merged into the repository*

p8,l195: 'with smaller sample sizes' -> 'with fewer samples'?

*This text has been updated as suggested.*

One last important bit I just noticed: the mapping-orig.txt type links do not work for me as of 21/09/18 and must be fixed, e.g. <https://knights-lab.github.io/MLRepo/docs/datasets/claesson/mapping-orig.txt>.

*We thank the reviewer for catching this important broken link. We have fixed our code and updated all of the original mapping file links. They should all be working now.*
